# Supplementary material
Source: HighWire-hosted journal article supplement (https://bmjopen.bmj.com/content/12/9/e060775)
Supplement: inline-supplementary-material-1 [file inline-supplementary-material-1.pdf]

| Countries                                         | Lockdowns/ Curfews |              |                                                                    |
|---------------------------------------------------|--------------------|--------------|--------------------------------------------------------------------|
|                                                   | Date of began      | Date of end  | Type of lockdown                                                   |
| <b>1. Gulf area</b>                               |                    |              |                                                                    |
| Saudi Arabia <sup>1</sup>                         | March              | End of May   | Starting partial, then becoming full                               |
| United Arab Emirates <sup>2</sup>                 | March              | July         | Full                                                               |
| Bahrain                                           | March              | May          | Partial                                                            |
| Kuwait                                            | March              | May          | Starting partial, then becoming full                               |
| Oman                                              | April              | August       | Partial                                                            |
| Qatar                                             | March              | June         | Full                                                               |
| Jordan                                            | March              | July, 2021   | Starting full, then partial for weekdays and full for the weekends |
| Iran                                              | March              | End of April | Partial, and short-term full lockdown in certain area              |
| <b>2. North African countries</b>                 |                    |              |                                                                    |
| Algeria                                           | March              | July, 2021   | Full, then partial                                                 |
| Egypt                                             | March              | June         | Partial                                                            |
| Morocco                                           | March              |              |                                                                    |
| Tunisia                                           | March              | June         | Starting full, then partial                                        |
| Sudan                                             | No data            |              |                                                                    |
| <b>3. Fragile and conflict-affected countries</b> |                    |              |                                                                    |
| Syria                                             | No data            |              | Partial                                                            |
| Lebanon                                           | March              | May          | Partial                                                            |
| Yemen                                             | April              | July         | Partial, and short-term full lockdown in certain area              |
| Iraq                                              | March              | No data      | No data                                                            |
| Palestine                                         | No data            |              | Partial                                                            |
| Libya                                             | No data            |              | Partial on weekdays, full on weekends                              |
| Somalia                                           | No data            |              |                                                                    |
| <b>4. Others</b>                                  |                    |              |                                                                    |

<sup>1</sup> Mohammad Nurunnabi, "The Preventive Strategies of COVID-19 Pandemic in Saudi Arabia.," *Journal of Microbiology, Immunology, and Infection = Wei Mian Yu Gan Ran Za Zhi*, February 2021, <https://doi.org/10.1016/j.jmii.2020.07.023>.

<sup>2</sup> Leila Cheikh Ismail et al., "Impact of the Coronavirus Pandemic (COVID-19) Lockdown on Mental Health and Well-Being in the United Arab Emirates ," *Frontiers in Psychiatry* , 2021, <https://www.frontiersin.org/article/10.3389/fpsy.2021.633230>.

<sup>3</sup> [New COVID-related Measures In Effect Starting November 20](#)". Overseas Security Advisory Council. Retrieved 9 December 2020.

<sup>4</sup> ["COVID-19 Information"](#). US Embassy in Djibouti. Retrieved 6 May 2020.

|                       |       |            |               |
|-----------------------|-------|------------|---------------|
| Turkey <sup>3</sup>   | Nov   | March 2021 | Partial       |
| Djibouti <sup>4</sup> | March | May        | Full lockdown |

- Kuwait starting again into partial lockdown on March 2021, to April 2021.
- Oman starting again into partial lockdown July 16-July 31, 2021 including three days of full lockdown (20-22 July, 2021).
- Jordan starting exclude fully vaccinated people from the partial lockdown on June 2021 (Ministry of Health of Jordan).
- Turkey partial lockdown was age-specific lockdown, for individuals age 65 and over, or 20 and below. For other ages, partial lockdown on weekend only .
