# Supplementary material
Source: HighWire-hosted journal article supplement (https://bmjopen.bmj.com/content/12/9/e060775)
Supplement: inline-supplementary-material-2 [file inline-supplementary-material-2.pdf]

| strain                           | gisaid_epi_isl   | originating_lab                                                             | authors                                                                                                                                                                                                                                                                                                                                                                                                                         |
|----------------------------------|------------------|-----------------------------------------------------------------------------|---------------------------------------------------------------------------------------------------------------------------------------------------------------------------------------------------------------------------------------------------------------------------------------------------------------------------------------------------------------------------------------------------------------------------------|
| hCoV-19/Iran/Qom-907/2020        | EPI_ISL_1014677  | National Influenza Center, Virology Department                              | NZ Shafiei Jandaghi, V Salimi, A Nejadi, K Sadeghi, J Yavarian, N Ghavvami, F Ajaminejad and T Mokhtari Azad                                                                                                                                                                                                                                                                                                                    |
| hCoV-19/Tunisia/GB1412/2020      | EPI_ISL_11172655 | Laboratory of Clinical Virology, Institut Pasteur de Tunis                  | Marwa Khechiri, Haifa Jmel, Wasfi Fares, Kais Ghedira, Maroua Boujemaa, Yosr Hamdi, Chaïma Hkimi, Nouha Jandoubi, Selim Kamoun, Nadia Khriji, Nessrine Mezzi, Najah Mighri, Rahma Mkaouer, Houcemeddine Othman, Lilia Romdhane, Ridha Mrad, Amira Jamoussi, Agnes Hamzaoui, Sonia Abdelhak,Henda Triki, Rym Kefi                                                                                                                |
| hCoV-19/Tunisia/GB0406/2020      | EPI_ISL_11172656 | Laboratory of Clinical Virology, Institut Pasteur de Tunis                  | Marwa Khechiri, Haifa Jmel, Wasfi Fares, Kais Ghedira, Maroua Boujemaa, Yosr Hamdi, Chaïma Hkimi, Nouha Jandoubi, Selim Kamoun, Nadia Khriji, Nessrine Mezzi, Najah Mighri, Rahma Mkaouer, Houcemeddine Othman, Lilia Romdhane, Ridha Mrad, Amira Jamoussi, Agnes Hamzaoui, Sonia Abdelhak,Henda Triki, Rym Kefi                                                                                                                |
| hCoV-19/Tunisia/GB0726/2020      | EPI_ISL_11172657 | Laboratory of Clinical Virology, Institut Pasteur de Tunis                  | Marwa Khechiri, Haifa Jmel, Wasfi Fares, Kais Ghedira, Maroua Boujemaa, Yosr Hamdi, Chaïma Hkimi, Nouha Jandoubi, Selim Kamoun, Nadia Khriji, Nessrine Mezzi, Najah Mighri, Rahma Mkaouer, Houcemeddine Othman, Lilia Romdhane, Ridha Mrad, Amira Jamoussi, Agnes Hamzaoui, Sonia Abdelhak,Henda Triki, Rym Kefi                                                                                                                |
| hCoV-19/Tunisia/GB0753/2020      | EPI_ISL_11172658 | Laboratory of Clinical Virology, Institut Pasteur de Tunis                  | Marwa Khechiri, Haifa Jmel, Wasfi Fares, Kais Ghedira, Maroua Boujemaa, Yosr Hamdi, Chaïma Hkimi, Nouha Jandoubi, Selim Kamoun, Nadia Khriji, Nessrine Mezzi, Najah Mighri, Rahma Mkaouer, Houcemeddine Othman, Lilia Romdhane, Ridha Mrad, Amira Jamoussi, Agnes Hamzaoui, Sonia Abdelhak,Henda Triki, Rym Kefi                                                                                                                |
| hCoV-19/Tunisia/GB0757/2020      | EPI_ISL_11172659 | Laboratory of Clinical Virology, Institut Pasteur de Tunis                  | Marwa Khechiri, Haifa Jmel, Wasfi Fares, Kais Ghedira, Maroua Boujemaa, Yosr Hamdi, Chaïma Hkimi, Nouha Jandoubi, Selim Kamoun, Nadia Khriji, Nessrine Mezzi, Najah Mighri, Rahma Mkaouer, Houcemeddine Othman, Lilia Romdhane, Ridha Mrad, Amira Jamoussi, Agnes Hamzaoui, Sonia Abdelhak,Henda Triki, Rym Kefi                                                                                                                |
| hCoV-19/Tunisia/P1879/2020       | EPI_ISL_11172674 | Laboratory of Clinical Virology, Institut Pasteur de Tunis                  | Haifa Jmel, Marwa Khechiri, Kais Ghedira, Wasfi Fares, Maroua Boujemaa, Yosr Hamdi, Chaïma Hkimi, Nouha Jandoubi, Selim kamoun, Nadia Khriji, Nessrine Mezzi, Najah Mighri, Rahma Mkaouer, Houcemeddine Othman, Lilia Romdhane, Ridha Mrad, Amira Jamoussi, Agnes Hamzaoui, Sonia Abdelhak,Henda Triki, Rym Kefi                                                                                                                |
| hCoV-19/Tunisia/Q0297/2020       | EPI_ISL_11172675 | Laboratory of Clinical Virology, Institut Pasteur de Tunis                  | Haifa Jmel, Marwa Khechiri, Kais Ghedira, Wasfi Fares, Maroua Boujemaa, Yosr Hamdi, Chaïma Hkimi, Nouha Jandoubi, Selim kamoun, Nadia Khriji, Nessrine Mezzi, Najah Mighri, Rahma Mkaouer, Houcemeddine Othman, Lilia Romdhane, Ridha Mrad, Amira Jamoussi, Agnes Hamzaoui, Sonia Abdelhak,Henda Triki, Rym Kefi                                                                                                                |
| hCoV-19/Egypt/NRC1-2/2020        | EPI_ISL_1273103  | Department of Microbial Biotechnology, Genetic Engineering Division, Nation | Dawood,R.M., Khalifa,M.K., Taha,A.G., Farghaly,A., Fikry,A.E. and Shemis,M.                                                                                                                                                                                                                                                                                                                                                     |
| hCoV-19/Egypt/NRC1/2020          | EPI_ISL_1315064  | Armed Forces Medical Research Laboratories and Blood Bank, Egypt            | Reham Dawood, Mohamed Khalifa, Ahmed Taha, Ayman Farghaly, Ahmed Elsayed, Mohamed Shemis                                                                                                                                                                                                                                                                                                                                        |
| hCoV-19/Egypt/NRC2/2020          | EPI_ISL_1315065  | Armed Forces Medical Research Laboratories and Blood Bank, Egypt            | Reham Dawood, Mohamed Khalifa, Ahmed Taha, Ayman Farghaly, Ahmed Elsayed, Mohamed Shemis                                                                                                                                                                                                                                                                                                                                        |
| hCoV-19/Iran/Hormozgan/2020      | EPI_ISL_1533610  | Shiraz University                                                           | Abazar Ghorbani, Hakimeh Ahmadi, Hamed Goukani, Ebrahim Eftekhari                                                                                                                                                                                                                                                                                                                                                               |
| hCoV-19/Qatar/QA-QU_01-2/2020    | EPI_ISL_1712664  | Ministry of Public Health / Hamad Medical Corporation                       | BRC: Fatima M. Benslimane, Heba A. Al-Khatib, Oal Al-Jamal, Dana Al-Batesh, Hadi M. Yassine, Asmaa A. Al-Thani. MOPH and HMC: Abdullatif Al-Khal, Muna A. S. Al-Maslami, Mashael A. Al-Bader, Hamda Alromalhi, Roberto Bertolini, Peter V. Coyle, Einas A. E. Al-Kuwari, Hamad E. Al-Romali, Salih Al-Marri, Mohammed Al-Thani, Reham A. El-Kahlout. QBB: Tasneem Al-Hamad, Dina Elgakhlab QGP: Fatima H. Al-Kuwari, Chadi Saad |
| hCoV-19/Qatar/QA-QU_02-2-1/2020  | EPI_ISL_1712684  | Ministry of Public Health / Hamad Medical Corporation                       | BRC: Fatima M. Benslimane, Heba A. Al-Khatib, Oal Al-Jamal, Dana Al-Batesh, Hadi M. Yassine, Asmaa A. Al-Thani. MOPH and HMC: Abdullatif Al-Khal, Muna A. S. Al-Maslami, Mashael A. Al-Bader, Hamda Alromalhi, Roberto Bertolini, Peter V. Coyle, Einas A. E. Al-Kuwari, Hamad E. Al-Romali, Salih Al-Marri, Mohammed Al-Thani, Reham A. El-Kahlout. QBB: Tasneem Al-Hamad, Dina Elgakhlab QGP: Fatima H. Al-Kuwari, Chadi Saad |
| hCoV-19/Qatar/QA-QU_02-2-18/2020 | EPI_ISL_1712686  | Ministry of Public Health / Hamad Medical Corporation                       | BRC: Fatima M. Benslimane, Heba A. Al-Khatib, Oal Al-Jamal, Dana Al-Batesh, Hadi M. Yassine, Asmaa A. Al-Thani. MOPH and HMC: Abdullatif Al-Khal, Muna A. S. Al-Maslami, Mashael A. Al-Bader, Hamda Alromalhi, Roberto Bertolini, Peter V. Coyle, Einas A. E. Al-Kuwari, Hamad E. Al-Romali, Salih Al-Marri, Mohammed Al-Thani, Reham A. El-Kahlout. QBB: Tasneem Al-Hamad, Dina Elgakhlab QGP: Fatima H. Al-Kuwari, Chadi Saad |
| hCoV-19/Qatar/QA-QU_02-2-22/2020 | EPI_ISL_1712689  | Ministry of Public Health / Hamad Medical Corporation                       | BRC: Fatima M. Benslimane, Heba A. Al-Khatib, Oal Al-Jamal, Dana Al-Batesh, Hadi M. Yassine, Asmaa A. Al-Thani. MOPH and HMC: Abdullatif Al-Khal, Muna A. S. Al-Maslami, Mashael A. Al-Bader, Hamda Alromalhi, Roberto Bertolini, Peter V. Coyle, Einas A. E. Al-Kuwari, Hamad E. Al-Romali, Salih Al-Marri, Mohammed Al-Thani, Reham A. El-Kahlout. QBB: Tasneem Al-Hamad, Dina Elgakhlab QGP: Fatima H. Al-Kuwari, Chadi Saad |
| hCoV-19/Qatar/QA-QU_02-2-27/2020 | EPI_ISL_1712691  | Ministry of Public Health / Hamad Medical Corporation                       | BRC: Fatima M. Benslimane, Heba A. Al-Khatib, Oal Al-Jamal, Dana Al-Batesh, Hadi M. Yassine, Asmaa A. Al-Thani. MOPH and HMC: Abdullatif Al-Khal, Muna A. S. Al-Maslami, Mashael A. Al-Bader, Hamda Alromalhi, Roberto Bertolini, Peter V. Coyle, Einas A. E. Al-Kuwari, Hamad E. Al-Romali, Salih Al-Marri, Mohammed Al-Thani, Reham A. El-Kahlout. QBB: Tasneem Al-Hamad, Dina Elgakhlab QGP: Fatima H. Al-Kuwari, Chadi Saad |
| hCoV-19/Qatar/QA-QU_02-2-29/2020 | EPI_ISL_1712692  | Ministry of Public Health / Hamad Medical Corporation                       | BRC: Fatima M. Benslimane, Heba A. Al-Khatib, Oal Al-Jamal, Dana Al-Batesh, Hadi M. Yassine, Asmaa A. Al-Thani. MOPH and HMC: Abdullatif Al-Khal, Muna A. S. Al-Maslami, Mashael A. Al-Bader, Hamda Alromalhi, Roberto Bertolini, Peter V. Coyle, Einas A. E. Al-Kuwari, Hamad E. Al-Romali, Salih Al-Marri, Mohammed Al-Thani, Reham A. El-Kahlout. QBB: Tasneem Al-Hamad, Dina Elgakhlab QGP: Fatima H. Al-Kuwari, Chadi Saad |
| hCoV-19/Qatar/QA-QU_02-2-30/2020 | EPI_ISL_1712693  | Ministry of Public Health / Hamad Medical Corporation                       | BRC: Fatima M. Benslimane, Heba A. Al-Khatib, Oal Al-Jamal, Dana Al-Batesh, Hadi M. Yassine, Asmaa A. Al-Thani. MOPH and HMC: Abdullatif Al-Khal, Muna A. S. Al-Maslami, Mashael A. Al-Bader, Hamda Alromalhi, Roberto Bertolini, Peter V. Coyle, Einas A. E. Al-Kuwari, Hamad E. Al-Romali, Salih Al-Marri, Mohammed Al-Thani, Reham A. El-Kahlout. QBB: Tasneem Al-Hamad, Dina Elgakhlab QGP: Fatima H. Al-Kuwari, Chadi Saad |
| hCoV-19/Qatar/QA-QU_02-2-31/2020 | EPI_ISL_1712694  | Ministry of Public Health / Hamad Medical Corporation                       | BRC: Fatima M. Benslimane, Heba A. Al-Khatib, Oal Al-Jamal, Dana Al-Batesh, Hadi M. Yassine, Asmaa A. Al-Thani. MOPH and HMC: Abdullatif Al-Khal, Muna A. S. Al-Maslami, Mashael A. Al-Bader, Hamda Alromalhi, Roberto Bertolini, Peter V. Coyle, Einas A. E. Al-Kuwari, Hamad E. Al-Romali, Salih Al-Marri, Mohammed Al-Thani, Reham A. El-Kahlout. QBB: Tasneem Al-Hamad, Dina Elgakhlab QGP: Fatima H. Al-Kuwari, Chadi Saad |
| hCoV-19/Qatar/QA-QU_02-2-35/2020 | EPI_ISL_1712695  | Ministry of Public Health / Hamad Medical Corporation                       | BRC: Fatima M. Benslimane, Heba A. Al-Khatib, Oal Al-Jamal, Dana Al-Batesh, Hadi M. Yassine, Asmaa A. Al-Thani. MOPH and HMC: Abdullatif Al-Khal, Muna A. S. Al-Maslami, Mashael A. Al-Bader, Hamda Alromalhi, Roberto Bertolini, Peter V. Coyle, Einas A. E. Al-Kuwari, Hamad E. Al-Romali, Salih Al-Marri, Mohammed Al-Thani, Reham A. El-Kahlout. QBB: Tasneem Al-Hamad, Dina Elgakhlab QGP: Fatima H. Al-Kuwari, Chadi Saad |
| hCoV-19/Qatar/QA-QU_02-2-39/2020 | EPI_ISL_1712696  | Ministry of Public Health / Hamad Medical Corporation                       | BRC: Fatima M. Benslimane, Heba A. Al-Khatib, Oal Al-Jamal, Dana Al-Batesh, Hadi M. Yassine, Asmaa A. Al-Thani. MOPH and HMC: Abdullatif Al-Khal, Muna A. S. Al-Maslami, Mashael A. Al-Bader, Hamda Alromalhi, Roberto Bertolini, Peter V. Coyle, Einas A. E. Al-Kuwari, Hamad E. Al-Romali, Salih Al-Marri, Mohammed Al-Thani, Reham A. El-Kahlout. QBB: Tasneem Al-Hamad, Dina Elgakhlab QGP: Fatima H. Al-Kuwari, Chadi Saad |
| hCoV-19/Qatar/QA-QU_02-2-4/2020  | EPI_ISL_1712697  | Ministry of Public Health / Hamad Medical Corporation                       | BRC: Fatima M. Benslimane, Heba A. Al-Khatib, Oal Al-Jamal, Dana Al-Batesh, Hadi M. Yassine, Asmaa A. Al-Thani. MOPH and HMC: Abdullatif Al-Khal, Muna A. S. Al-Maslami, Mashael A. Al-Bader, Hamda Alromalhi, Roberto Bertolini, Peter V. Coyle, Einas A. E. Al-Kuwari, Hamad E. Al-Romali, Salih Al-Marri, Mohammed Al-Thani, Reham A. El-Kahlout. QBB: Tasneem Al-Hamad, Dina Elgakhlab QGP: Fatima H. Al-Kuwari, Chadi Saad |
| hCoV-19/Qatar/QA-QU_02-2-40/2020 | EPI_ISL_1712698  | Ministry of Public Health / Hamad Medical Corporation                       | BRC: Fatima M. Benslimane, Heba A. Al-Khatib, Oal Al-Jamal, Dana Al-Batesh, Hadi M. Yassine, Asmaa A. Al-Thani. MOPH and HMC: Abdullatif Al-Khal, Muna A. S. Al-Maslami, Mashael A. Al-Bader, Hamda Alromalhi, Roberto Bertolini, Peter V. Coyle, Einas A. E. Al-Kuwari, Hamad E. Al-Romali, Salih Al-Marri, Mohammed Al-Thani, Reham A. El-Kahlout. QBB: Tasneem Al-Hamad, Dina Elgakhlab QGP: Fatima H. Al-Kuwari, Chadi Saad |
| hCoV-19/Qatar/QA-QU_02-2-44/2020 | EPI_ISL_1712699  | Ministry of Public Health / Hamad Medical Corporation                       | BRC: Fatima M. Benslimane, Heba A. Al-Khatib, Oal Al-Jamal, Dana Al-Batesh, Hadi M. Yassine, Asmaa A. Al-Thani. MOPH and HMC: Abdullatif Al-Khal, Muna A. S. Al-Maslami, Mashael A. Al-Bader, Hamda Alromalhi, Roberto Bertolini, Peter V. Coyle, Einas A. E. Al-Kuwari, Hamad E. Al-Romali, Salih Al-Marri, Mohammed Al-Thani, Reham A. El-Kahlout. QBB: Tasneem Al-Hamad, Dina Elgakhlab QGP: Fatima H. Al-Kuwari, Chadi Saad |
| hCoV-19/Qatar/QA-QU_02-2-49/2020 | EPI_ISL_1712701  | Ministry of Public Health / Hamad Medical Corporation                       | BRC: Fatima M. Benslimane, Heba A. Al-Khatib, Oal Al-Jamal, Dana Al-Batesh, Hadi M. Yassine, Asmaa A. Al-Thani. MOPH and HMC: Abdullatif Al-Khal, Muna A. S. Al-Maslami, Mashael A. Al-Bader, Hamda Alromalhi, Roberto Bertolini, Peter V. Coyle, Einas A. E. Al-Kuwari, Hamad E. Al-Romali, Salih Al-Marri, Mohammed Al-Thani, Reham A. El-Kahlout. QBB: Tasneem Al-Hamad, Dina Elgakhlab QGP: Fatima H. Al-Kuwari, Chadi Saad |
| hCoV-19/Qatar/QA-QU_02-2-5/2020  | EPI_ISL_1712702  | Ministry of Public Health / Hamad Medical Corporation                       | BRC: Fatima M. Benslimane, Heba A. Al-Khatib, Oal Al-Jamal, Dana Al-Batesh, Hadi M. Yassine, Asmaa A. Al-Thani. MOPH and HMC: Abdullatif Al-Khal, Muna A. S. Al-Maslami, Mashael A. Al-Bader, Hamda Alromalhi, Roberto Bertolini, Peter V. Coyle, Einas A. E. Al-Kuwari, Hamad E. Al-Romali, Salih Al-Marri, Mohammed Al-Thani, Reham A. El-Kahlout. QBB: Tasneem Al-Hamad, Dina Elgakhlab QGP: Fatima H. Al-Kuwari, Chadi Saad |
| hCoV-19/Qatar/QA-QU_02-2-59/2020 | EPI_ISL_1712703  | Ministry of Public Health / Hamad Medical Corporation                       | BRC: Fatima M. Benslimane, Heba A. Al-Khatib, Oal Al-Jamal, Dana Al-Batesh, Hadi M. Yassine, Asmaa A. Al-Thani. MOPH and HMC: Abdullatif Al-Khal, Muna A. S. Al-Maslami, Mashael A. Al-Bader, Hamda Alromalhi, Roberto Bertolini, Peter V. Coyle, Einas A. E. Al-Kuwari, Hamad E. Al-Romali, Salih Al-Marri, Mohammed Al-Thani, Reham A. El-Kahlout. QBB: Tasneem Al-Hamad, Dina Elgakhlab QGP: Fatima H. Al-Kuwari, Chadi Saad |
| hCoV-19/Qatar/QA-QU_02-2-6/2020  | EPI_ISL_1712704  | Ministry of Public Health / Hamad Medical Corporation                       | BRC: Fatima M. Benslimane, Heba A. Al-Khatib, Oal Al-Jamal, Dana Al-Batesh, Hadi M. Yassine, Asmaa A. Al-Thani. MOPH and HMC: Abdullatif Al-Khal, Muna A. S. Al-Maslami, Mashael A. Al-Bader, Hamda Alromalhi, Roberto Bertolini, Peter V. Coyle, Einas A. E. Al-Kuwari, Hamad E. Al-Romali, Salih Al-Marri, Mohammed Al-Thani, Reham A. El-Kahlout. QBB: Tasneem Al-Hamad, Dina Elgakhlab QGP: Fatima H. Al-Kuwari, Chadi Saad |
| hCoV-19/Qatar/QA-QU_02-2-60/2020 | EPI_ISL_1712705  | Ministry of Public Health / Hamad Medical Corporation                       | BRC: Fatima M. Benslimane, Heba A. Al-Khatib, Oal Al-Jamal, Dana Al-Batesh, Hadi M. Yassine, Asmaa A. Al-Thani. MOPH and HMC: Abdullatif Al-Khal, Muna A. S. Al-Maslami, Mashael A. Al-Bader, Hamda Alromalhi, Roberto Bertolini, Peter V. Coyle, Einas A. E. Al-Kuwari, Hamad E. Al-Romali, Salih Al-Marri, Mohammed Al-Thani, Reham A. El-Kahlout. QBB: Tasneem Al-Hamad, Dina Elgakhlab QGP: Fatima H. Al-Kuwari, Chadi Saad |

|                                     |                 |                                                                                 |                                                                                                                                                                                                                                                                                                                                                                                                                                    |
|-------------------------------------|-----------------|---------------------------------------------------------------------------------|------------------------------------------------------------------------------------------------------------------------------------------------------------------------------------------------------------------------------------------------------------------------------------------------------------------------------------------------------------------------------------------------------------------------------------|
| hCoV-19/Qatar/QA-QU_02-2-7/2020     | EPI_ISL_1712706 | Ministry of Public Health / Hamad Medical Corporation                           | BR/CF: Fatiha M. Benslimane, Heba A. Al-Khatib, Oai Al-Jamal, Dana Al-Batesh, Hadi M. Yassine, Asmaa A. Al-Thani. MOPH and HMC: Abdullatif Al-Khal, Muna A. S. Al-Maslami, Mashaal A. Al-Bader, Hamda Alromahi, Roberto Bertolini, Peter V. Coyle, Einas A. E. Al-Kuwari, Hamad E. Al-Romahi, Salih Al-Marri, Mohammed Al-Thani, Reham A. El-Khailout. OBB: Tasneem Al-Hamad, Dina Elgakhlab. OGP: Fatima H. Al-Kuwari, Chadi Saad |
| hCoV-19/Qatar/QA-QU_02-2-9/2020     | EPI_ISL_1712707 | Ministry of Public Health / Hamad Medical Corporation                           | BR/CF: Fatiha M. Benslimane, Heba A. Al-Khatib, Oai Al-Jamal, Dana Al-Batesh, Hadi M. Yassine, Asmaa A. Al-Thani. MOPH and HMC: Abdullatif Al-Khal, Muna A. S. Al-Maslami, Mashaal A. Al-Bader, Hamda Alromahi, Roberto Bertolini, Peter V. Coyle, Einas A. E. Al-Kuwari, Hamad E. Al-Romahi, Salih Al-Marri, Mohammed Al-Thani, Reham A. El-Khailout. OBB: Tasneem Al-Hamad, Dina Elgakhlab. OGP: Fatima H. Al-Kuwari, Chadi Saad |
| hCoV-19/Turkey/CTF_16032020_001/20  | EPI_ISL_2015127 | IJ-Cerrahpasa, Cerrahpasa School of Medicine, COVID-19 Lab                      | Mert Kusku, Yesim Tuyji Tok, Kenan Midilli                                                                                                                                                                                                                                                                                                                                                                                         |
| hCoV-19/Turkey/CTF_17032020_002/20  | EPI_ISL_2015128 | IJ-Cerrahpasa, Cerrahpasa School of Medicine, COVID-19 Lab                      | Mert Kusku, Yesim Tuyji Tok, Kenan Midilli                                                                                                                                                                                                                                                                                                                                                                                         |
| hCoV-19/Turkey/CTF_17032020_003/20  | EPI_ISL_2015129 | IJ-Cerrahpasa, Cerrahpasa School of Medicine, COVID-19 Lab                      | Mert Kusku, Yesim Tuyji Tok, Kenan Midilli                                                                                                                                                                                                                                                                                                                                                                                         |
| hCoV-19/Somalia/CV1159/2020         | EPI_ISL_2107094 | National Institute of Health (NIH) - Federal Government of Somalia              | Olawaye, I.B., Oluniyi, P.E., Eromon, P.E., Oguzie, J.U., Kayode, A.T., Uwanibe, J.N., Ugwu, C.A., Akano, K.O., Ajogbasile, F.V., Abechi, P.S., Olumade, T.J., Nosamiefan, I., Folarin, O., Hapli, C.T.                                                                                                                                                                                                                            |
| hCoV-19/Somalia/CV1161/2020         | EPI_ISL_2107095 | National Institute of Health (NIH) - Federal Government of Somalia              | Olawaye, I.B., Oluniyi, P.E., Eromon, P.E., Oguzie, J.U., Kayode, A.T., Uwanibe, J.N., Ugwu, C.A., Akano, K.O., Ajogbasile, F.V., Abechi, P.S., Olumade, T.J., Nosamiefan, I., Folarin, O., Hapli, C.T.                                                                                                                                                                                                                            |
| hCoV-19/Somalia/CV1173/2020         | EPI_ISL_2107096 | National Institute of Health (NIH) - Federal Government of Somalia              | Olawaye, I.B., Oluniyi, P.E., Eromon, P.E., Oguzie, J.U., Kayode, A.T., Uwanibe, J.N., Ugwu, C.A., Akano, K.O., Ajogbasile, F.V., Abechi, P.S., Olumade, T.J., Nosamiefan, I., Folarin, O., Hapli, C.T.                                                                                                                                                                                                                            |
| hCoV-19/Somalia/CV1182/2020         | EPI_ISL_2107100 | National Institute of Health (NIH) - Federal Government of Somalia              | Olawaye, I.B., Oluniyi, P.E., Eromon, P.E., Oguzie, J.U., Kayode, A.T., Uwanibe, J.N., Ugwu, C.A., Akano, K.O., Ajogbasile, F.V., Abechi, P.S., Olumade, T.J., Nosamiefan, I., Folarin, O., Hapli, C.T.                                                                                                                                                                                                                            |
| hCoV-19/Somalia/CV1185/2020         | EPI_ISL_2107101 | National Institute of Health (NIH) - Federal Government of Somalia              | Olawaye, I.B., Oluniyi, P.E., Eromon, P.E., Oguzie, J.U., Kayode, A.T., Uwanibe, J.N., Ugwu, C.A., Akano, K.O., Ajogbasile, F.V., Abechi, P.S., Olumade, T.J., Nosamiefan, I., Folarin, O., Hapli, C.T.                                                                                                                                                                                                                            |
| hCoV-19/Egypt/NRC-5159/2020         | EPI_ISL_2232407 | Center of Scientific Excellence for Influenza Viruses (CSEV), National Research | Rabeh El-Shesheny, Ahmed E Kayed, Ahmed El-Taweel, Mokhtar Goma, Sara Mahmoud, Yassmin Moatasim, Omnia Kutkat, Mina Kamel, Noura M Abo Shama, Mohamed El Sayes, Mahmoud Shehata, Ahmed Mostafa, Ahmed Kandeil, Richard Webby, Ghazi Kayali, Mohamed Ahmed Ali                                                                                                                                                                      |
| hCoV-19/Somalia/CV1232/2020         | EPI_ISL_2308255 | National Institute of Health (NIH) - Federal Government of Somalia              | Olawaye, I.B., Oluniyi, P.E., Eromon, P.E., Oguzie, J.U., Kayode, A.T., Uwanibe, J.N., Ugwu, C.A., Akano, K.O., Ajogbasile, F.V., Abechi, P.S., Olumade, T.J., Nosamiefan, I., Folarin, O., Hapli, C.T.                                                                                                                                                                                                                            |
| hCoV-19/Somalia/CV1236/2020         | EPI_ISL_2308257 | National Institute of Health (NIH) - Federal Government of Somalia              | Olawaye, I.B., Oluniyi, P.E., Eromon, P.E., Oguzie, J.U., Kayode, A.T., Uwanibe, J.N., Ugwu, C.A., Akano, K.O., Ajogbasile, F.V., Abechi, P.S., Olumade, T.J., Nosamiefan, I., Folarin, O., Hapli, C.T.                                                                                                                                                                                                                            |
| hCoV-19/Iraq/HTh20210602_111/2020   | EPI_ISL_2383317 | The teaching Baghdad hospital                                                   | Abdulhusein Thaeer, Fadhil Hula                                                                                                                                                                                                                                                                                                                                                                                                    |
| hCoV-19/Iran/GRC-60/2020            | EPI_ISL_2693675 | Department of Molecular Diagnostic, Emam Ali Educational and Therapeutic        | Zohreh Fattahi, Marzieh Mohseni, Khadijeh Jalalvand, Azam Ghaziasadi, Seyedeh elham Mortazavi, Ali Jafarpour, Zakiye Mokhames Mokhames, Alireza Soleimani, Kimia Kahrizi, Seyed Mohammad Jazayeri, Hossein Najmabadi.                                                                                                                                                                                                              |
| hCoV-19/Iran/GRC-89/2020            | EPI_ISL_2693907 | Infectious Diseases Research Center, Birjand University of Medical Sciences,    | Zohreh Fattahi, Marzieh Mohseni, Khadijeh Jalalvand, Azam Ghaziasadi, Seyedeh elham Mortazavi, Ali Jafarpour, Shokoh Ghafari, Masood Ziaee, Kimia Kahrizi, Seyed Mohammad Jazayeri, Hossein Najmabadi.                                                                                                                                                                                                                             |
| hCoV-19/Iran/GRC-3/2020             | EPI_ISL_2693908 | Department of Infectious Disease, School of Medicine, Sina Hospital, Tehran     | Zohreh Fattahi, Marzieh Mohseni, Khadijeh Jalalvand, Jila Yavarian, Kimia Kahrizi, Talat Mokhtari-Azad, Hossein Najmabadi.                                                                                                                                                                                                                                                                                                         |
| hCoV-19/Iran/GRC-4/2020             | EPI_ISL_2693972 | Virology Centre, School of public health, Tehran University of Medical Science  | Zohreh Fattahi, Marzieh Mohseni, Khadijeh Jalalvand, Jila Yavarian, Kimia Kahrizi, Talat Mokhtari-Azad, Hossein Najmabadi.                                                                                                                                                                                                                                                                                                         |
| hCoV-19/Iran/GRC-5/2020             | EPI_ISL_2694195 | Virology Centre, School of public health, Tehran University of Medical Science  | Zohreh Fattahi, Marzieh Mohseni, Khadijeh Jalalvand, Jila Yavarian, Kimia Kahrizi, Talat Mokhtari-Azad, Hossein Najmabadi.                                                                                                                                                                                                                                                                                                         |
| hCoV-19/Iran/GRC-6/2020             | EPI_ISL_2694587 | Virology Centre, School of public health, Tehran University of Medical Science  | Zohreh Fattahi, Marzieh Mohseni, Khadijeh Jalalvand, Jila Yavarian, Kimia Kahrizi, Talat Mokhtari-Azad, Hossein Najmabadi.                                                                                                                                                                                                                                                                                                         |
| hCoV-19/Djibouti/CNSS00103-IHU10312 | EPI_ISL_2820509 | Laboratoire de Diagnostic, Centre de Soins 1, Caisse Nationale de SVD curitv    | Ikram Omar Osman; Anthony Levasseur; Ludvine Brechar; Iman Abdillahi Hassan; Idli Salah abdillahi; Zeinab Ali Waberi; Jeremy Delere; Linda Houhadi; Pierre-Edouard Fournier; Philippe Colson; Mohamed Houmed Aboubaker; Didier Raoult; Christian A. Devaux.                                                                                                                                                                        |
| hCoV-19/Djibouti/CNSS00115-IHU10312 | EPI_ISL_2820514 | Laboratoire de Diagnostic, Centre de Soins 1, Caisse Nationale de SVD curitv    | Ikram Omar Osman; Anthony Levasseur; Ludvine Brechar; Iman Abdillahi Hassan; Idli Salah abdillahi; Zeinab Ali Waberi; Jeremy Delere; Linda Houhadi; Pierre-Edouard Fournier; Philippe Colson; Mohamed Houmed Aboubaker; Didier Raoult; Christian A. Devaux.                                                                                                                                                                        |
| hCoV-19/Djibouti/CNSS00187-IHU10312 | EPI_ISL_2820520 | Laboratoire de Diagnostic, Centre de Soins 1, Caisse Nationale de SVD curitv    | Ikram Omar Osman; Anthony Levasseur; Ludvine Brechar; Iman Abdillahi Hassan; Idli Salah abdillahi; Zeinab Ali Waberi; Jeremy Delere; Linda Houhadi; Pierre-Edouard Fournier; Philippe Colson; Mohamed Houmed Aboubaker; Didier Raoult; Christian A. Devaux.                                                                                                                                                                        |
| hCoV-19/Djibouti/CNSS00326-IHU10312 | EPI_ISL_2820547 | Laboratoire de Diagnostic, Centre de Soins 1, Caisse Nationale de SVD curitv    | Ikram Omar Osman; Anthony Levasseur; Ludvine Brechar; Iman Abdillahi Hassan; Idli Salah abdillahi; Zeinab Ali Waberi; Jeremy Delere; Linda Houhadi; Pierre-Edouard Fournier; Philippe Colson; Mohamed Houmed Aboubaker; Didier Raoult; Christian A. Devaux.                                                                                                                                                                        |
| hCoV-19/Djibouti/CNSS00388-IHU10312 | EPI_ISL_2820621 | Laboratoire de Diagnostic, Centre de Soins 1, Caisse Nationale de SVD curitv    | Ikram Omar Osman; Anthony Levasseur; Ludvine Brechar; Iman Abdillahi Hassan; Idli Salah abdillahi; Zeinab Ali Waberi; Jeremy Delere; Linda Houhadi; Pierre-Edouard Fournier; Philippe Colson; Mohamed Houmed Aboubaker; Didier Raoult; Christian A. Devaux.                                                                                                                                                                        |
| hCoV-19/Djibouti/CNSS00390-IHU10312 | EPI_ISL_2820626 | Laboratoire de Diagnostic, Centre de Soins 1, Caisse Nationale de SVD curitv    | Ikram Omar Osman; Anthony Levasseur; Ludvine Brechar; Iman Abdillahi Hassan; Idli Salah abdillahi; Zeinab Ali Waberi; Jeremy Delere; Linda Houhadi; Pierre-Edouard Fournier; Philippe Colson; Mohamed Houmed Aboubaker; Didier Raoult; Christian A. Devaux.                                                                                                                                                                        |
| hCoV-19/Djibouti/CNSS00182-IHU10312 | EPI_ISL_2820756 | Laboratoire de Diagnostic, Centre de Soins 1, Caisse Nationale de SVD curitv    | Ikram Omar Osman; Anthony Levasseur; Ludvine Brechar; Iman Abdillahi Hassan; Idli Salah abdillahi; Zeinab Ali Waberi; Jeremy Delere; Linda Houhadi; Pierre-Edouard Fournier; Philippe Colson; Mohamed Houmed Aboubaker; Didier Raoult; Christian A. Devaux.                                                                                                                                                                        |
| hCoV-19/Djibouti/CNSS00206-IHU10312 | EPI_ISL_2820757 | Laboratoire de Diagnostic, Centre de Soins 1, Caisse Nationale de SVD curitv    | Ikram Omar Osman; Anthony Levasseur; Ludvine Brechar; Iman Abdillahi Hassan; Idli Salah abdillahi; Zeinab Ali Waberi; Jeremy Delere; Linda Houhadi; Pierre-Edouard Fournier; Philippe Colson; Mohamed Houmed Aboubaker; Didier Raoult; Christian A. Devaux.                                                                                                                                                                        |
| hCoV-19/Djibouti/NAMRU3_A08/2020    | EPI_ISL_2860827 | Naval Medical Research Unit No. 3                                               | Catherine E. Arnold, Regina Z. Cer, Logan J. Voegtly, Kyle A. Long, Bishwo N. Adhikari, Emily K. Stefanov, Andrew J. Bennett, Andrea E. Luquette, Francisco Malagon, Luis A. Estrella, Michael V. Deschenes, Chaselynn M. Watters, Stephen M. Eggan, and Kimberly A. Bishop-Lilly                                                                                                                                                  |
| hCoV-19/Djibouti/NAMRU3_A09/2020    | EPI_ISL_2860828 | Naval Medical Research Unit No. 3                                               | Catherine E. Arnold, Regina Z. Cer, Logan J. Voegtly, Kyle A. Long, Bishwo N. Adhikari, Emily K. Stefanov, Andrew J. Bennett, Andrea E. Luquette, Francisco Malagon, Luis A. Estrella, Michael V. Deschenes, Chaselynn M. Watters, Stephen M. Eggan, and Kimberly A. Bishop-Lilly                                                                                                                                                  |
| hCoV-19/Djibouti/NAMRU3_A10/2020    | EPI_ISL_2860829 | Naval Medical Research Unit No. 3                                               | Catherine E. Arnold, Regina Z. Cer, Logan J. Voegtly, Kyle A. Long, Bishwo N. Adhikari, Emily K. Stefanov, Andrew J. Bennett, Andrea E. Luquette, Francisco Malagon, Luis A. Estrella, Michael V. Deschenes, Chaselynn M. Watters, Stephen M. Eggan, and Kimberly A. Bishop-Lilly                                                                                                                                                  |
| hCoV-19/Djibouti/NAMRU3_A11/2020    | EPI_ISL_2860830 | Naval Medical Research Unit No. 3                                               | Catherine E. Arnold, Regina Z. Cer, Logan J. Voegtly, Kyle A. Long, Bishwo N. Adhikari, Emily K. Stefanov, Andrew J. Bennett, Andrea E. Luquette, Francisco Malagon, Luis A. Estrella, Michael V. Deschenes, Chaselynn M. Watters, Stephen M. Eggan, and Kimberly A. Bishop-Lilly                                                                                                                                                  |
| hCoV-19/Djibouti/NAMRU3_A14/2020    | EPI_ISL_2860831 | Naval Medical Research Unit No. 3                                               | Catherine E. Arnold, Regina Z. Cer, Logan J. Voegtly, Kyle A. Long, Bishwo N. Adhikari, Emily K. Stefanov, Andrew J. Bennett, Andrea E. Luquette, Francisco Malagon, Luis A. Estrella, Michael V. Deschenes, Chaselynn M. Watters, Stephen M. Eggan, and Kimberly A. Bishop-Lilly                                                                                                                                                  |
| hCoV-19/Djibouti/NAMRU3_A19/2020    | EPI_ISL_2860832 | Naval Medical Research Unit No. 3                                               | Catherine E. Arnold, Regina Z. Cer, Logan J. Voegtly, Kyle A. Long, Bishwo N. Adhikari, Emily K. Stefanov, Andrew J. Bennett, Andrea E. Luquette, Francisco Malagon, Luis A. Estrella, Michael V. Deschenes, Chaselynn M. Watters, Stephen M. Eggan, and Kimberly A. Bishop-Lilly                                                                                                                                                  |
| hCoV-19/Djibouti/NAMRU3_A21/2020    | EPI_ISL_2860833 | Naval Medical Research Unit No. 3                                               | Catherine E. Arnold, Regina Z. Cer, Logan J. Voegtly, Kyle A. Long, Bishwo N. Adhikari, Emily K. Stefanov, Andrew J. Bennett, Andrea E. Luquette, Francisco Malagon, Luis A. Estrella, Michael V. Deschenes, Chaselynn M. Watters, Stephen M. Eggan, and Kimberly A. Bishop-Lilly                                                                                                                                                  |
| hCoV-19/Djibouti/NAMRU3_A71/2020    | EPI_ISL_2860834 | Naval Medical Research Unit No. 3                                               | Catherine E. Arnold, Regina Z. Cer, Logan J. Voegtly, Kyle A. Long, Bishwo N. Adhikari, Emily K. Stefanov, Andrew J. Bennett, Andrea E. Luquette, Francisco Malagon, Luis A. Estrella, Michael V. Deschenes, Chaselynn M. Watters, Stephen M. Eggan, and Kimberly A. Bishop-Lilly                                                                                                                                                  |
| hCoV-19/Djibouti/NAMRU3_DZ10/2020   | EPI_ISL_2860889 | Naval Medical Research Unit No. 3                                               | Catherine E. Arnold, Regina Z. Cer, Logan J. Voegtly, Kyle A. Long, Bishwo N. Adhikari, Emily K. Stefanov, Andrew J. Bennett, Andrea E. Luquette, Francisco Malagon, Luis A. Estrella, Michael V. Deschenes, Chaselynn M. Watters, Stephen M. Eggan, and Kimberly A. Bishop-Lilly                                                                                                                                                  |
| hCoV-19/SouthSudan/UGS78/2020       | EPI_ISL_2928025 | South Sudan Ministry of Health, WHO South Sudan, MRC/UVRI & LSH/TM Ug           | Joseph Francis Wamala, Abe G. Abias, Dennis Kemy Lodongo, Sudhir Bunga, James Ayele, Lu Lojok Deng, Richard Lino Loro Lako, John Rumunu, Juma John HM, Dan Lufe Bugembe, Pontiano Kaleebu, Matthew Cotten, My V.T. Phan                                                                                                                                                                                                            |
| hCoV-19/Iraq/Hula-02/2020           | EPI_ISL_3402237 | Baghdad Teaching Hospital                                                       | Thaeer, A.A. and Hula, F.Y.                                                                                                                                                                                                                                                                                                                                                                                                        |

|                                    |                 |                                                                            |                                                                                                                                                                                                                                                                                                  |
|------------------------------------|-----------------|----------------------------------------------------------------------------|--------------------------------------------------------------------------------------------------------------------------------------------------------------------------------------------------------------------------------------------------------------------------------------------------|
| hCoV-19/Djibouti/NAMRU3_A04/2020   | EPI_ISL_3845307 | Naval Medical Research Unit No. 3                                          | Catherine E. Arnold, Regina Z. Cer, Logan J. Voegtly, Kyle A. Long, Emily K. Stefanov, Andrew J. Bennett, Andrea E. Luquette, Robin H. Miller, Francisco Malagon, Luis A. Estrella, Lindsay A. Glang, Michael V. Deschenes, Chaselynn M. Watters, Stephen M. Eggan, and Kimberly A. Bishop-Lilly |
| hCoV-19/Djibouti/NAMRU3_A06/2020   | EPI_ISL_3845310 | Naval Medical Research Unit No. 3                                          | Catherine E. Arnold, Regina Z. Cer, Logan J. Voegtly, Kyle A. Long, Emily K. Stefanov, Andrew J. Bennett, Andrea E. Luquette, Robin H. Miller, Francisco Malagon, Luis A. Estrella, Lindsay A. Glang, Michael V. Deschenes, Chaselynn M. Watters, Stephen M. Eggan, and Kimberly A. Bishop-Lilly |
| hCoV-19/Djibouti/NAMRU3_A07/2020   | EPI_ISL_3845313 | Naval Medical Research Unit No. 3                                          | Catherine E. Arnold, Regina Z. Cer, Logan J. Voegtly, Kyle A. Long, Emily K. Stefanov, Andrew J. Bennett, Andrea E. Luquette, Robin H. Miller, Francisco Malagon, Luis A. Estrella, Lindsay A. Glang, Michael V. Deschenes, Chaselynn M. Watters, Stephen M. Eggan, and Kimberly A. Bishop-Lilly |
| hCoV-19/Djibouti/NAMRU3_A25/2020   | EPI_ISL_3845316 | Naval Medical Research Unit No. 3                                          | Catherine E. Arnold, Regina Z. Cer, Logan J. Voegtly, Kyle A. Long, Emily K. Stefanov, Andrew J. Bennett, Andrea E. Luquette, Robin H. Miller, Francisco Malagon, Luis A. Estrella, Lindsay A. Glang, Michael V. Deschenes, Chaselynn M. Watters, Stephen M. Eggan, and Kimberly A. Bishop-Lilly |
| hCoV-19/Djibouti/NAMRU3_C25/2020   | EPI_ISL_3845345 | Naval Medical Research Unit No. 3                                          | Catherine E. Arnold, Regina Z. Cer, Logan J. Voegtly, Kyle A. Long, Emily K. Stefanov, Andrew J. Bennett, Andrea E. Luquette, Robin H. Miller, Francisco Malagon, Luis A. Estrella, Lindsay A. Glang, Michael V. Deschenes, Chaselynn M. Watters, Stephen M. Eggan, and Kimberly A. Bishop-Lilly |
| hCoV-19/Djibouti/NAMRU3_C28/2020   | EPI_ISL_3845348 | Naval Medical Research Unit No. 3                                          | Catherine E. Arnold, Regina Z. Cer, Logan J. Voegtly, Kyle A. Long, Emily K. Stefanov, Andrew J. Bennett, Andrea E. Luquette, Robin H. Miller, Francisco Malagon, Luis A. Estrella, Lindsay A. Glang, Michael V. Deschenes, Chaselynn M. Watters, Stephen M. Eggan, and Kimberly A. Bishop-Lilly |
| hCoV-19/Djibouti/NAMRU3_C49/2020   | EPI_ISL_3845350 | Naval Medical Research Unit No. 3                                          | Catherine E. Arnold, Regina Z. Cer, Logan J. Voegtly, Kyle A. Long, Emily K. Stefanov, Andrew J. Bennett, Andrea E. Luquette, Robin H. Miller, Francisco Malagon, Luis A. Estrella, Lindsay A. Glang, Michael V. Deschenes, Chaselynn M. Watters, Stephen M. Eggan, and Kimberly A. Bishop-Lilly |
| hCoV-19/Djibouti/NAMRU3_CL1/2020   | EPI_ISL_3845355 | Naval Medical Research Unit No. 3                                          | Catherine E. Arnold, Regina Z. Cer, Logan J. Voegtly, Kyle A. Long, Emily K. Stefanov, Andrew J. Bennett, Andrea E. Luquette, Robin H. Miller, Francisco Malagon, Luis A. Estrella, Lindsay A. Glang, Michael V. Deschenes, Chaselynn M. Watters, Stephen M. Eggan, and Kimberly A. Bishop-Lilly |
| hCoV-19/Djibouti/NAMRU3_CL2/2020   | EPI_ISL_3845359 | Naval Medical Research Unit No. 3                                          | Catherine E. Arnold, Regina Z. Cer, Logan J. Voegtly, Kyle A. Long, Emily K. Stefanov, Andrew J. Bennett, Andrea E. Luquette, Robin H. Miller, Francisco Malagon, Luis A. Estrella, Lindsay A. Glang, Michael V. Deschenes, Chaselynn M. Watters, Stephen M. Eggan, and Kimberly A. Bishop-Lilly |
| hCoV-19/Djibouti/NAMRU3_CL5/2020   | EPI_ISL_3845360 | Naval Medical Research Unit No. 3                                          | Catherine E. Arnold, Regina Z. Cer, Logan J. Voegtly, Kyle A. Long, Emily K. Stefanov, Andrew J. Bennett, Andrea E. Luquette, Robin H. Miller, Francisco Malagon, Luis A. Estrella, Lindsay A. Glang, Michael V. Deschenes, Chaselynn M. Watters, Stephen M. Eggan, and Kimberly A. Bishop-Lilly |
| hCoV-19/Djibouti/NAMRU3_D12/2020   | EPI_ISL_3845362 | Naval Medical Research Unit No. 3                                          | Catherine E. Arnold, Regina Z. Cer, Logan J. Voegtly, Kyle A. Long, Emily K. Stefanov, Andrew J. Bennett, Andrea E. Luquette, Robin H. Miller, Francisco Malagon, Luis A. Estrella, Lindsay A. Glang, Michael V. Deschenes, Chaselynn M. Watters, Stephen M. Eggan, and Kimberly A. Bishop-Lilly |
| hCoV-19/Djibouti/NAMRU3_E19/2020   | EPI_ISL_3845369 | Naval Medical Research Unit No. 3                                          | Catherine E. Arnold, Regina Z. Cer, Logan J. Voegtly, Kyle A. Long, Emily K. Stefanov, Andrew J. Bennett, Andrea E. Luquette, Robin H. Miller, Francisco Malagon, Luis A. Estrella, Lindsay A. Glang, Michael V. Deschenes, Chaselynn M. Watters, Stephen M. Eggan, and Kimberly A. Bishop-Lilly |
| hCoV-19/Djibouti/NAMRU3_HS/2020    | EPI_ISL_3845395 | Naval Medical Research Unit No. 3                                          | Catherine E. Arnold, Regina Z. Cer, Logan J. Voegtly, Kyle A. Long, Emily K. Stefanov, Andrew J. Bennett, Andrea E. Luquette, Robin H. Miller, Francisco Malagon, Luis A. Estrella, Lindsay A. Glang, Michael V. Deschenes, Chaselynn M. Watters, Stephen M. Eggan, and Kimberly A. Bishop-Lilly |
| hCoV-19/Djibouti/NAMRU3_KH/2020    | EPI_ISL_3845401 | Naval Medical Research Unit No. 3                                          | Catherine E. Arnold, Regina Z. Cer, Logan J. Voegtly, Kyle A. Long, Emily K. Stefanov, Andrew J. Bennett, Andrea E. Luquette, Robin H. Miller, Francisco Malagon, Luis A. Estrella, Lindsay A. Glang, Michael V. Deschenes, Chaselynn M. Watters, Stephen M. Eggan, and Kimberly A. Bishop-Lilly |
| hCoV-19/Djibouti/NAMRU3_E06/2020   | EPI_ISL_3920432 | Naval Medical Research Unit No. 3                                          | Catherine E. Arnold, Regina Z. Cer, Logan J. Voegtly, Kyle A. Long, Emily K. Stefanov, Andrew J. Bennett, Andrea E. Luquette, Robin H. Miller, Francisco Malagon, Luis A. Estrella, Lindsay A. Glang, Michael V. Deschenes, Chaselynn M. Watters, Stephen M. Eggan, and Kimberly A. Bishop-Lilly |
| hCoV-19/Djibouti/NAMRU3_E106/2020  | EPI_ISL_3920433 | Naval Medical Research Unit No. 3                                          | Catherine E. Arnold, Regina Z. Cer, Logan J. Voegtly, Kyle A. Long, Emily K. Stefanov, Andrew J. Bennett, Andrea E. Luquette, Robin H. Miller, Francisco Malagon, Luis A. Estrella, Lindsay A. Glang, Michael V. Deschenes, Chaselynn M. Watters, Stephen M. Eggan, and Kimberly A. Bishop-Lilly |
| hCoV-19/Djibouti/NAMRU3_G19/2020   | EPI_ISL_3920434 | Naval Medical Research Unit No. 3                                          | Catherine E. Arnold, Regina Z. Cer, Logan J. Voegtly, Kyle A. Long, Emily K. Stefanov, Andrew J. Bennett, Andrea E. Luquette, Robin H. Miller, Francisco Malagon, Luis A. Estrella, Lindsay A. Glang, Michael V. Deschenes, Chaselynn M. Watters, Stephen M. Eggan, and Kimberly A. Bishop-Lilly |
| hCoV-19/Wuhan/Hu-1/2019            | EPI_ISL_402125  | National Institute for Communicable Disease Control and Prevention (ICDC)  | Zhang, Y.-Z., Wu, F., Chen, Y.-M., Pei, Y.-X., Xu, L., Wang, W., Zhao, S., Yu, B., Hu, Y., Tao, Z.-W., Song, Z.-G., Tian, J.-H., Zhang, Y.-L., Liu, Y., Zheng, J.-J., Dai, F.-H., Wang, Q.-M., Shen, L.-L. and Zhu, T.-Y.                                                                        |
| hCoV-19/Wuhan/WH01/2019            | EPI_ISL_406798  | General Hospital of Central Theater Command of People's Liberation Army of | WeiJun Chen, Yuhai Bi, Weifeng Shi and Zhenhong Hu                                                                                                                                                                                                                                               |
| hCoV-19/SaudiArabia/CV1249/2020    | EPI_ISL_416030  | Public Health Laboratory- Saudi CDC                                        | Public Health Laboratory- Saudi CDC                                                                                                                                                                                                                                                              |
| hCoV-19/SaudiArabia/KAMRC-Alghorib | EPI_ISL_416432  | Clinical Microbiology Lab                                                  | Majed Alghoribi, Sadeem Alhalhi, Abdulrahman Alswaij, Liliane Okdah, Sameera Al Johani, Michel Doumith                                                                                                                                                                                           |
| hCoV-19/Kuwait/KU12/2020           | EPI_ISL_416458  | Virology laboratory Ministry of Health Kuwait sequenced at Dasman Diabetes | Fahd Al-Mulla, Sumi John, Sara Alqabandi, Rasheeba Iqbal, Motasem Melhem, Ebaa AlOzairi, Qais Al-Duwairi                                                                                                                                                                                         |
| hCoV-19/SaudiArabia/SCDC-3321/2020 | EPI_ISL_416521  | Public Health Laboratory                                                   | Albarrag, A                                                                                                                                                                                                                                                                                      |
| hCoV-19/SaudiArabia/SCDC-3324/2020 | EPI_ISL_416522  | Public Health Laboratory, Saudi CDC                                        | Albarrag, A                                                                                                                                                                                                                                                                                      |
| hCoV-19/Kuwait/KU09/2020           | EPI_ISL_416541  | Dasman Diabetes Institute and Virology Laboratory Ministry of Health       | Fahd Al-Mulla, Sumi John, Rasheeba Iqbal, Motasem Melhem, Ebaa AlOzairi, Sara Al-Qabandi, Qais Al-Duwairi                                                                                                                                                                                        |
| hCoV-19/Kuwait/KU17/2020           | EPI_ISL_416542  | Dasman Diabetes Institute                                                  | Fahd Al-Mulla, Sumi John, Rasheeba Iqbal, Motasem Melhem, Ebaa AlOzairi, Sara Al-Qabandi, Qais Al-Duwairi                                                                                                                                                                                        |
| hCoV-19/Kuwait/KU18/2020           | EPI_ISL_416543  | Dasman Diabetes Institute                                                  | Fahd Al-Mulla, Rasheeba Iqbal, Sumi John, Motasem Melhem, Ebaa AlOzairi, Sara Al-Qabandi, Qais Al-Duwairi                                                                                                                                                                                        |
| hCoV-19/Algeria/G0638_2264/2020    | EPI_ISL_418241  | NIC Viral Respiratory Unit - Institut Pasteur of Algeria                   | MV@lanie Albert, Marion Barbet, Sylvie Behillil, MV@line Bizard, Angela Brisebarre, Flora Donati, Etienne Simon-Loriv@re, Vincent Enouf, Maud Vanpeene, Sylvie van der Werf, Fawzi Derraz                                                                                                        |
| hCoV-19/Algeria/G0640_2265/2020    | EPI_ISL_418242  | NIC Viral Respiratory Unit - Institut Pasteur of Algeria                   | MV@lanie Albert, Marion Barbet, Sylvie Behillil, MV@line Bizard, Angela Brisebarre, Flora Donati, Etienne Simon-Loriv@re, Vincent Enouf, Maud Vanpeene, Sylvie van der Werf, Fawzi Derraz                                                                                                        |
| hCoV-19/Algeria/G0860_2262/2020    | EPI_ISL_420037  | NIC Viral Respiratory Unit - Institut Pasteur of Algeria                   | MV@lanie Albert, Marion Barbet, Sylvie Behillil, MV@line Bizard, Angela Brisebarre, Flora Donati, Etienne Simon-Loriv@re, Vincent Enouf, Maud Vanpeene, Sylvie van der Werf, Fawzi Derraz                                                                                                        |
| hCoV-19/Kuwait/KU006/2020          | EPI_ISL_422424  | Jaber Al Ahmad Al Sabah Hospital                                           | Fahd Al-Mulla, Rasheeba Iqbal, Sumi John, Ebaa Al-Ozairi, Qais Al-Duwairi                                                                                                                                                                                                                        |
| hCoV-19/Kuwait/KU005/2020          | EPI_ISL_422426  | JABER AL AHMAD AL SABAH HOSPITAL, AI KUWAIT CITY                           | Fahd Al-Mulla, Rasheeba Iqbal, Sumi John, Ebaa Al-Ozairi, Qais Al-Duwairi                                                                                                                                                                                                                        |
| hCoV-19/Kuwait/KU008/2020          | EPI_ISL_422427  | JABER AL AHMAD AL SABAH HOSPITAL, AI KUWAIT CITY                           | Fahd Al-Mulla, Rasheeba Iqbal, Sumi John, Ebaa Al-Ozairi, Qais Al-Duwairi                                                                                                                                                                                                                        |
| hCoV-19/Turkey/ERAGEM-001/2020     | EPI_ISL_424366  | Vaccine Research, Development and Application Center, Erciyes University   | Shaikh Terkis Islam Pavel, Hazel Yetislin, Günsu Aydın, Can Holyavkin, Muhammet Ali Uygut, Zehra B Dursun, Ferihami Celik, Alper Iseri, Aykut Ozdemirelli                                                                                                                                        |
| hCoV-19/Turkey/HSGM-4706/2020      | EPI_ISL_428712  | Ministry of Health Turkey                                                  | Fatma Bayraktar, Ay@e Ba+uak Alta+u, Yasemin Co+ugun, GV@ay Korukluo@ulu, SelvBuk K@f@e+v@e                                                                                                                                                                                                      |
| hCoV-19/Turkey/HSGM-5516/2020      | EPI_ISL_428713  | Ministry of Health Turkey                                                  | Fatma Bayraktar, Ay@e Ba+uak Alta+u, Yasemin Co+ugun, GV@ay Korukluo@ulu, SelvBuk K@f@e+v@e                                                                                                                                                                                                      |
| hCoV-19/Turkey/HSGM-5602/2020      | EPI_ISL_428714  | Ministry of Health Turkey                                                  | Fatma Bayraktar, Ay@e Ba+uak Alta+u, Yasemin Co+ugun, GV@ay Korukluo@ulu, SelvBuk K@f@e+v@e                                                                                                                                                                                                      |
| hCoV-19/Turkey/HSGM-5624/2020      | EPI_ISL_428715  | Ministry of Health Turkey                                                  | Fatma Bayraktar, Ay@e Ba+uak Alta+u, Yasemin Co+ugun, GV@ay Korukluo@ulu, SelvBuk K@f@e+v@e                                                                                                                                                                                                      |
| hCoV-19/Turkey/HSGM-5711/2020      | EPI_ISL_428716  | Ministry of Health Turkey                                                  | Fatma Bayraktar, Ay@e Ba+uak Alta+u, Yasemin Co+ugun, GV@ay Korukluo@ulu, SelvBuk K@f@e+v@e                                                                                                                                                                                                      |
| hCoV-19/Turkey/HSGM-5769/2020      | EPI_ISL_428717  | Ministry of Health Turkey                                                  | Fatma Bayraktar, Ay@e Ba+uak Alta+u, Yasemin Co+ugun, GV@ay Korukluo@ulu, SelvBuk K@f@e+v@e                                                                                                                                                                                                      |
| hCoV-19/Turkey/HSGM-8992/2020      | EPI_ISL_429865  | Ministry of Health Turkey                                                  | Fatma Bayraktar, Ay@e Ba+uak Alta+u, Yasemin Co+ugun, GV@ay Korukluo@ulu, SelvBuk K@f@e+v@e                                                                                                                                                                                                      |
| hCoV-19/Turkey/HSGM-4236/2020      | EPI_ISL_429866  | Ministry of Health Turkey                                                  | Fatma Bayraktar, Ay@e Ba+uak Alta+u, Yasemin Co+ugun, GV@ay Korukluo@ulu, SelvBuk K@f@e+v@e                                                                                                                                                                                                      |
| hCoV-19/Turkey/HSGM-4505/2020      | EPI_ISL_429867  | Ministry of Health Turkey                                                  | Fatma Bayraktar, Ay@e Ba+uak Alta+u, Yasemin Co+ugun, GV@ay Korukluo@ulu, SelvBuk K@f@e+v@e                                                                                                                                                                                                      |
| hCoV-19/Turkey/HSGM-4598/2020      | EPI_ISL_429868  | Ministry of Health Turkey                                                  | Fatma Bayraktar, Ay@e Ba+uak Alta+u, Yasemin Co+ugun, GV@ay Korukluo@ulu, SelvBuk K@f@e+v@e                                                                                                                                                                                                      |
| hCoV-19/Turkey/HSGM-4701/2020      | EPI_ISL_429869  | Ministry of Health Turkey                                                  | Fatma Bayraktar, Ay@e Ba+uak Alta+u, Yasemin Co+ugun, GV@ay Korukluo@ulu, SelvBuk K@f@e+v@e                                                                                                                                                                                                      |
| hCoV-19/Jordan/SR-032/2020         | EPI_ISL_429992  | Biolab Diagnostic Laboratories                                             | Issa Abu-Dayyeh, Ahmad Tibi, Lama Hussein, Lina Mohammad, Zein Naber, Amid Abdelnour with SEARCH Alliance San Diego                                                                                                                                                                              |

|                                     |                |                                                                                 |                                                                                                                                                                                                                                                                                                     |
|-------------------------------------|----------------|---------------------------------------------------------------------------------|-----------------------------------------------------------------------------------------------------------------------------------------------------------------------------------------------------------------------------------------------------------------------------------------------------|
| hCoV-19/Jordan/SR-033/2020          | EPI_ISL_429993 | Biolab Diagnostic Laboratories                                                  | Issa Abu-Dayyeh, Ahmad Tibi, Lama Hussein, Lina Mohammad, Zein Naber, Amr Abdelnour with SEARCH Alliance San Diego                                                                                                                                                                                  |
| hCoV-19/Jordan/SR-034/2020          | EPI_ISL_429994 | Biolab Diagnostic Laboratories                                                  | Issa Abu-Dayyeh, Ahmad Tibi, Lama Hussein, Lina Mohammad, Zein Naber, Amr Abdelnour with SEARCH Alliance San Diego                                                                                                                                                                                  |
| hCoV-19/Jordan/SR-036/2020          | EPI_ISL_429996 | Biolab Diagnostic Laboratories                                                  | Issa Abu-Dayyeh, Ahmad Tibi, Lama Hussein, Lina Mohammad, Zein Naber, Amr Abdelnour with SEARCH Alliance San Diego                                                                                                                                                                                  |
| hCoV-19/Jordan/SR-037/2020          | EPI_ISL_429997 | Biolab Diagnostic Laboratories                                                  | Issa Abu-Dayyeh, Ahmad Tibi, Lama Hussein, Lina Mohammad, Zein Naber, Amr Abdelnour with SEARCH Alliance San Diego                                                                                                                                                                                  |
| hCoV-19/Jordan/SR-039/2020          | EPI_ISL_429998 | Biolab Diagnostic Laboratories                                                  | Issa Abu-Dayyeh, Ahmad Tibi, Lama Hussein, Lina Mohammad, Zein Naber, Amr Abdelnour with SEARCH Alliance San Diego                                                                                                                                                                                  |
| hCoV-19/Jordan/SR-041/2020          | EPI_ISL_429999 | Biolab Diagnostic Laboratories                                                  | Issa Abu-Dayyeh, Ahmad Tibi, Lama Hussein, Lina Mohammad, Zein Naber, Amr Abdelnour with SEARCH Alliance San Diego                                                                                                                                                                                  |
| hCoV-19/Jordan/SR-043/2020          | EPI_ISL_430001 | Biolab Diagnostic Laboratories                                                  | Issa Abu-Dayyeh, Ahmad Tibi, Lama Hussein, Lina Mohammad, Zein Naber, Amr Abdelnour with SEARCH Alliance San Diego                                                                                                                                                                                  |
| hCoV-19/Jordan/SR-044/2020          | EPI_ISL_430002 | Biolab Diagnostic Laboratories                                                  | Issa Abu-Dayyeh, Ahmad Tibi, Lama Hussein, Lina Mohammad, Zein Naber, Amr Abdelnour with SEARCH Alliance San Diego                                                                                                                                                                                  |
| hCoV-19/Jordan/SR-045/2020          | EPI_ISL_430003 | Biolab Diagnostic Laboratories                                                  | Issa Abu-Dayyeh, Ahmad Tibi, Lama Hussein, Lina Mohammad, Zein Naber, Amr Abdelnour with SEARCH Alliance San Diego                                                                                                                                                                                  |
| hCoV-19/Jordan/SR-046/2020          | EPI_ISL_430004 | Biolab Diagnostic Laboratories                                                  | Issa Abu-Dayyeh, Ahmad Tibi, Lama Hussein, Lina Mohammad, Zein Naber, Amr Abdelnour with SEARCH Alliance San Diego                                                                                                                                                                                  |
| hCoV-19/Jordan/SR-048/2020          | EPI_ISL_430006 | Biolab Diagnostic Laboratories                                                  | Issa Abu-Dayyeh, Ahmad Tibi, Lama Hussein, Lina Mohammad, Zein Naber, Amr Abdelnour with SEARCH Alliance San Diego                                                                                                                                                                                  |
| hCoV-19/Jordan/SR-049/2020          | EPI_ISL_430007 | Biolab Diagnostic Laboratories                                                  | Issa Abu-Dayyeh, Ahmad Tibi, Lama Hussein, Lina Mohammad, Zein Naber, Amr Abdelnour with SEARCH Alliance San Diego                                                                                                                                                                                  |
| hCoV-19/Jordan/SR-052/2020          | EPI_ISL_430009 | Biolab Diagnostic Laboratories                                                  | Issa Abu-Dayyeh, Ahmad Tibi, Lama Hussein, Lina Mohammad, Zein Naber, Amr Abdelnour with SEARCH Alliance San Diego                                                                                                                                                                                  |
| hCoV-19/Jordan/SR-053/2020          | EPI_ISL_430011 | Biolab Diagnostic Laboratories                                                  | Issa Abu-Dayyeh, Ahmad Tibi, Lama Hussein, Lina Mohammad, Zein Naber, Amr Abdelnour with SEARCH Alliance San Diego                                                                                                                                                                                  |
| hCoV-19/Jordan/SR-054/2020          | EPI_ISL_430012 | Biolab Diagnostic Laboratories                                                  | Issa Abu-Dayyeh, Ahmad Tibi, Lama Hussein, Lina Mohammad, Zein Naber, Amr Abdelnour with SEARCH Alliance San Diego                                                                                                                                                                                  |
| hCoV-19/Jordan/SR-056/2020          | EPI_ISL_430014 | Biolab Diagnostic Laboratories                                                  | Issa Abu-Dayyeh, Ahmad Tibi, Lama Hussein, Lina Mohammad, Zein Naber, Amr Abdelnour with SEARCH Alliance San Diego                                                                                                                                                                                  |
| hCoV-19/Jordan/SR-057/2020          | EPI_ISL_430015 | Biolab Diagnostic Laboratories                                                  | Issa Abu-Dayyeh, Ahmad Tibi, Lama Hussein, Lina Mohammad, Zein Naber, Amr Abdelnour with SEARCH Alliance San Diego                                                                                                                                                                                  |
| hCoV-19/Egypt/NRC-03/2020           | EPI_ISL_430819 | Center of Scientific Excellence for Influenza Viruses, National Research Centre | Mohamed Ahmed Ali, Ahmed Kandell, Ahmed Mostafa, Rabeh El-Shesheny, Mahmoud Shehata, Wael Roshdy, Shymaa Showky Ahmed, Amal Naguib, Nancy M. El Gundi, Mokhtar Gomaa, Ahmed El-Taweel, Ahmed E Kayed, Yassin Moatasim, Omnia Kutkat, Sara Mahmoud, Mina Kamel, Abo Shama, M Noura, Mohamed El Sayes |
| hCoV-19/Egypt/NRC-01/2020           | EPI_ISL_430820 | Center of Scientific Excellence for Influenza Viruses, National Research Centre | Mohamed Ahmed Ali, Ahmed Kandell, Ahmed Mostafa, Rabeh El-Shesheny, Mahmoud Shehata, Wael Roshdy, Shymaa Showky Ahmed, Amal Naguib, Nancy M. El Gundi                                                                                                                                               |
| hCoV-19/UnitedArabEmirates/L0/2020  | EPI_ISL_435119 | Mohammed Bin Rashid University of Medicine and Health Sciences                  | Ahmad Abou Tayoun, Tom Loney, Hamda Khansaheb, Sathishkumar Ramaswamy, Divinlal Harilal, Zulfu Omar Deesi, Rupa Murthy Varghese, Hanan Al Suwaidi, Abdulmajeed Alkhalifa, Mohammed Uddin, Rifat Hamoudi, Rabih Halwani, Abiola Catherine Senok, Qutayba Hamid, Norbert Nowotny, Alawi Alsheikh-Ali  |
| hCoV-19/UnitedArabEmirates/L0184/20 | EPI_ISL_435121 | Mohammed Bin Rashid University of Medicine and Health Sciences                  | Ahmad Abou Tayoun, Tom Loney, Hamda Khansaheb, Sathishkumar Ramaswamy, Divinlal Harilal, Zulfu Omar Deesi, Rupa Murthy Varghese, Hanan Al Suwaidi, Abdulmajeed Alkhalifa, Mohammed Uddin, Rifat Hamoudi, Rabih Halwani, Abiola Catherine Senok, Qutayba Hamid, Norbert Nowotny, Alawi Alsheikh-Ali  |
| hCoV-19/UnitedArabEmirates/L0904/20 | EPI_ISL_435126 | Mohammed Bin Rashid University of Medicine and Health Sciences                  | Ahmad Abou Tayoun, Tom Loney, Hamda Khansaheb, Sathishkumar Ramaswamy, Divinlal Harilal, Zulfu Omar Deesi, Rupa Murthy Varghese, Hanan Al Suwaidi, Abdulmajeed Alkhalifa, Mohammed Uddin, Rifat Hamoudi, Rabih Halwani, Abiola Catherine Senok, Qutayba Hamid, Norbert Nowotny, Alawi Alsheikh-Ali  |
| hCoV-19/UnitedArabEmirates/L1758/20 | EPI_ISL_435129 | Mohammed Bin Rashid University of Medicine and Health Sciences                  | Ahmad Abou Tayoun, Tom Loney, Hamda Khansaheb, Sathishkumar Ramaswamy, Divinlal Harilal, Zulfu Omar Deesi, Rupa Murthy Varghese, Hanan Al Suwaidi, Abdulmajeed Alkhalifa, Mohammed Uddin, Rifat Hamoudi, Rabih Halwani, Abiola Catherine Senok, Qutayba Hamid, Norbert Nowotny, Alawi Alsheikh-Ali  |
| hCoV-19/UnitedArabEmirates/L2185/20 | EPI_ISL_435130 | Mohammed Bin Rashid University of Medicine and Health Sciences                  | Ahmad Abou Tayoun, Tom Loney, Hamda Khansaheb, Sathishkumar Ramaswamy, Divinlal Harilal, Zulfu Omar Deesi, Rupa Murthy Varghese, Hanan Al Suwaidi, Abdulmajeed Alkhalifa, Mohammed Uddin, Rifat Hamoudi, Rabih Halwani, Abiola Catherine Senok, Qutayba Hamid, Norbert Nowotny, Alawi Alsheikh-Ali  |
| hCoV-19/UnitedArabEmirates/L2409/20 | EPI_ISL_435131 | Mohammed Bin Rashid University of Medicine and Health Sciences                  | Ahmad Abou Tayoun, Tom Loney, Hamda Khansaheb, Sathishkumar Ramaswamy, Divinlal Harilal, Zulfu Omar Deesi, Rupa Murthy Varghese, Hanan Al Suwaidi, Abdulmajeed Alkhalifa, Mohammed Uddin, Rifat Hamoudi, Rabih Halwani, Abiola Catherine Senok, Qutayba Hamid, Norbert Nowotny, Alawi Alsheikh-Ali  |
| hCoV-19/UnitedArabEmirates/L4184/20 | EPI_ISL_435133 | Mohammed Bin Rashid University of Medicine and Health Sciences                  | Ahmad Abou Tayoun, Tom Loney, Hamda Khansaheb, Sathishkumar Ramaswamy, Divinlal Harilal, Zulfu Omar Deesi, Rupa Murthy Varghese, Hanan Al Suwaidi, Abdulmajeed Alkhalifa, Mohammed Uddin, Rifat Hamoudi, Rabih Halwani, Abiola Catherine Senok, Qutayba Hamid, Norbert Nowotny, Alawi Alsheikh-Ali  |
| hCoV-19/UnitedArabEmirates/L4280/20 | EPI_ISL_435134 | Mohammed Bin Rashid University of Medicine and Health Sciences                  | Ahmad Abou Tayoun, Tom Loney, Hamda Khansaheb, Sathishkumar Ramaswamy, Divinlal Harilal, Zulfu Omar Deesi, Rupa Murthy Varghese, Hanan Al Suwaidi, Abdulmajeed Alkhalifa, Mohammed Uddin, Rifat Hamoudi, Rabih Halwani, Abiola Catherine Senok, Qutayba Hamid, Norbert Nowotny, Alawi Alsheikh-Ali  |
| hCoV-19/UnitedArabEmirates/L4682/20 | EPI_ISL_435135 | Mohammed Bin Rashid University of Medicine and Health Sciences                  | Ahmad Abou Tayoun, Tom Loney, Hamda Khansaheb, Sathishkumar Ramaswamy, Divinlal Harilal, Zulfu Omar Deesi, Rupa Murthy Varghese, Hanan Al Suwaidi, Abdulmajeed Alkhalifa, Mohammed Uddin, Rifat Hamoudi, Rabih Halwani, Abiola Catherine Senok, Qutayba Hamid, Norbert Nowotny, Alawi Alsheikh-Ali  |
| hCoV-19/UnitedArabEmirates/L5621/20 | EPI_ISL_435136 | Mohammed Bin Rashid University of Medicine and Health Sciences                  | Ahmad Abou Tayoun, Tom Loney, Hamda Khansaheb, Sathishkumar Ramaswamy, Divinlal Harilal, Zulfu Omar Deesi, Rupa Murthy Varghese, Hanan Al Suwaidi, Abdulmajeed Alkhalifa, Mohammed Uddin, Rifat Hamoudi, Rabih Halwani, Abiola Catherine Senok, Qutayba Hamid, Norbert Nowotny, Alawi Alsheikh-Ali  |
| hCoV-19/UnitedArabEmirates/L5630/20 | EPI_ISL_435137 | Mohammed Bin Rashid University of Medicine and Health Sciences                  | Ahmad Abou Tayoun, Tom Loney, Hamda Khansaheb, Sathishkumar Ramaswamy, Divinlal Harilal, Zulfu Omar Deesi, Rupa Murthy Varghese, Hanan Al Suwaidi, Abdulmajeed Alkhalifa, Mohammed Uddin, Rifat Hamoudi, Rabih Halwani, Abiola Catherine Senok, Qutayba Hamid, Norbert Nowotny, Alawi Alsheikh-Ali  |
| hCoV-19/UnitedArabEmirates/L6599/20 | EPI_ISL_435138 | Mohammed Bin Rashid University of Medicine and Health Sciences                  | Ahmad Abou Tayoun, Tom Loney, Hamda Khansaheb, Sathishkumar Ramaswamy, Divinlal Harilal, Zulfu Omar Deesi, Rupa Murthy Varghese, Hanan Al Suwaidi, Abdulmajeed Alkhalifa, Mohammed Uddin, Rifat Hamoudi, Rabih Halwani, Abiola Catherine Senok, Qutayba Hamid, Norbert Nowotny, Alawi Alsheikh-Ali  |
| hCoV-19/UnitedArabEmirates/L6627/20 | EPI_ISL_435139 | Mohammed Bin Rashid University of Medicine and Health Sciences                  | Ahmad Abou Tayoun, Tom Loney, Hamda Khansaheb, Sathishkumar Ramaswamy, Divinlal Harilal, Zulfu Omar Deesi, Rupa Murthy Varghese, Hanan Al Suwaidi, Abdulmajeed Alkhalifa, Mohammed Uddin, Rifat Hamoudi, Rabih Halwani, Abiola Catherine Senok, Qutayba Hamid, Norbert Nowotny, Alawi Alsheikh-Ali  |
| hCoV-19/UnitedArabEmirates/L7356/20 | EPI_ISL_435140 | Mohammed Bin Rashid University of Medicine and Health Sciences                  | Ahmad Abou Tayoun, Tom Loney, Hamda Khansaheb, Sathishkumar Ramaswamy, Divinlal Harilal, Zulfu Omar Deesi, Rupa Murthy Varghese, Hanan Al Suwaidi, Abdulmajeed Alkhalifa, Mohammed Uddin, Rifat Hamoudi, Rabih Halwani, Abiola Catherine Senok, Qutayba Hamid, Norbert Nowotny, Alawi Alsheikh-Ali  |
| hCoV-19/Turkey/HSGM-1492/2020       | EPI_ISL_437320 | Ministry of Health Turkey                                                       | Fatma Bayraktar, Ayşe Başıak Alta-ü, Yasemin Coşgun, Sümeyyan Yalvışın, Gv'lay Korukluoğlu, Selviük Kışfırsıv                                                                                                                                                                                       |
| hCoV-19/Turkey/HSGM-1432/2020       | EPI_ISL_437326 | Ministry of Health Turkey                                                       | Fatma Bayraktar, Ayşe Başıak Alta-ü, Yasemin Coşgun, Sümeyyan Yalvışın, Gv'lay Korukluoğlu, Selviük Kışfırsıv                                                                                                                                                                                       |
| hCoV-19/Turkey/HSGM-1458/2020       | EPI_ISL_437327 | Ministry of Health Turkey                                                       | Fatma Bayraktar, Ayşe Başıak Alta-ü, Yasemin Coşgun, Sümeyyan Yalvışın, Gv'lay Korukluoğlu, Selviük Kışfırsıv                                                                                                                                                                                       |
| hCoV-19/Turkey/HSGM-4698/2020       | EPI_ISL_437332 | Ministry of Health Turkey                                                       | Fatma Bayraktar, Ayşe Başıak Alta-ü, Yasemin Coşgun, Sümeyyan Yalvışın, Gv'lay Korukluoğlu, Selviük Kışfırsıv                                                                                                                                                                                       |
| hCoV-19/Iran/HGRC-2-2162/2020       | EPI_ISL_437512 | Human Genetic Research Center, Kawasr Biotech Company                           | Khoravi, M.A., Abbasalipour, M., Zeinali, S., Sabeghi, S., Hoesseini, F. and Haghdoust, Y.                                                                                                                                                                                                          |
| hCoV-19/Iran/KHGR-2-2162/2020       | EPI_ISL_442044 | Kawasr Human Genetic Research Center                                            | Mohammad Ali Khoravi, Maryam Abbasalipour Bashash, Siroos Zeinali, Solmaz Sabeghi, Yeganeh Keshvar, Fatemeh Hosseini, Yeganeh Haghdoust                                                                                                                                                             |
| hCoV-19/Iran/KHGR-1.1-1PI-8206/2020 | EPI_ISL_442523 | Pasteur Institute of Iran                                                       | Siroos Zeinali, Mohammad Ali Khoravi, Maryam Abbasalipour Bashash, Sanaz Mostafavi Jabbari, Maraym Firooz, Sormeh Pourtavakoli, Elmira Khatari, Razieh Zeinali and Fahimeh Hosseini                                                                                                                 |
| hCoV-19/Jordan/SR-0333/2020         | EPI_ISL_450186 | Biolab Diagnostic Laboratories                                                  | Issa Abu-Dayyeh, Ahmad Tibi, Lama Hussein, Lina Mohammad, Zein Naber, Amr Abdelnour with SEARCH Alliance San Diego                                                                                                                                                                                  |
| hCoV-19/Jordan/SR-0335/2020         | EPI_ISL_450187 | Biolab Diagnostic Laboratories                                                  | Issa Abu-Dayyeh, Ahmad Tibi, Lama Hussein, Lina Mohammad, Zein Naber, Amr Abdelnour with SEARCH Alliance San Diego                                                                                                                                                                                  |
| hCoV-19/Jordan/SR-0336/2020         | EPI_ISL_450188 | Biolab Diagnostic Laboratories                                                  | Issa Abu-Dayyeh, Ahmad Tibi, Lama Hussein, Lina Mohammad, Zein Naber, Amr Abdelnour with SEARCH Alliance San Diego                                                                                                                                                                                  |
| hCoV-19/Lebanon/S1_758/2020         | EPI_ISL_450508 | Rafik Hariri University Hospital                                                | Rita Feghalli                                                                                                                                                                                                                                                                                       |
| hCoV-19/Lebanon/S1_762/2020         | EPI_ISL_450512 | Rafik Hariri University Hospital                                                | Rita Feghalli                                                                                                                                                                                                                                                                                       |
| hCoV-19/Oman/RESP-20-797/2020       | EPI_ISL_457701 | Oman-NIC                                                                        | Samira Al-Marqu, Fahad Zadjali, Amna Al Jardani, Khulood Al-Mammari, Hanan Al-Kindi, Fatma BaAlawi, Hamida Al Barwani, Zeyana AL-Dahmani, Intisar Al-Shukri, Aisha Al-Busaidi, Aisha Al-Arri, AHAM Al-Arri, Mohammed Al-Tobi, Samiha Al Kharusi, Abdulla Balkhair                                   |
| hCoV-19/Oman/RESP-20-837/2020       | EPI_ISL_457704 | Oman-NIC                                                                        | Samira Al-Marqu, Fahad Zadjali, Amna Al Jardani, Khulood Al-Mammari, Hanan Al-Kindi, Fatma BaAlawi, Hamida Al Barwani, Zeyana AL-Dahmani, Intisar Al-Shukri, Aisha Al-Busaidi, Aisha Al-Arri, AHAM Al-Arri, Mohammed Al-Tobi, Samiha Al Kharusi, Abdulla Balkhair                                   |

|                                 |                |                                                                              |                                                                                                                                                                                                                                                                                                |
|---------------------------------|----------------|------------------------------------------------------------------------------|------------------------------------------------------------------------------------------------------------------------------------------------------------------------------------------------------------------------------------------------------------------------------------------------|
| hCoV-19/Oman/RESP-20-1189/2020  | EPI_ISL_457706 | Oman-NIC                                                                     | Samira Al-Maroufi, Fahad Zadjali, Amna Al Jardani, Khulood Al-Mammery, Hanan Al-Kindi, Fatma BaAlawi, Hamida Al Barwani, Zeyana AL-Dahmani, Intisar Al-Shukri, Aisha Al-Busaidi, Aisha Al-Amri, Aham Al-Amri, Mohammed Al-Tobi, Samiha Al Kharusi, Abdulla Balkhair                            |
| hCoV-19/Oman/RESP-20-1857/2020  | EPI_ISL_457937 | Oman-NIC                                                                     | Samira Al-Maroufi, Fahad Zadjali, Amna Al Jardani, Khulood Al-Mammery, Hanan Al-Kindi, Fatma BaAlawi, Hamida Al Barwani, Zeyana AL-Dahmani, Intisar Al-Shukri, Aisha Al-Busaidi, Aisha Al-Amri, Aham Al-Amri, Mohammed Al-Tobi, Samiha Al Kharusi, Abdulla Balkhair                            |
| hCoV-19/Oman/RESP-20-1976/2020  | EPI_ISL_457938 | Oman-NIC                                                                     | Samira Al-Maroufi, Fahad Zadjali, Amna Al Jardani, Khulood Al-Mammery, Hanan Al-Kindi, Fatma BaAlawi, Hamida Al Barwani, Zeyana AL-Dahmani, Intisar Al-Shukri, Aisha Al-Busaidi, Aisha Al-Amri, Aham Al-Amri, Mohammed Al-Tobi, Samiha Al Kharusi, Abdulla Balkhair                            |
| hCoV-19/Oman/RESP-20-2181/2020  | EPI_ISL_457939 | Oman-NIC                                                                     | Samira Al-Maroufi, Fahad Zadjali, Amna Al Jardani, Khulood Al-Mammery, Hanan Al-Kindi, Fatma BaAlawi, Hamida Al Barwani, Zeyana AL-Dahmani, Intisar Al-Shukri, Aisha Al-Busaidi, Aisha Al-Amri, Aham Al-Amri, Mohammed Al-Tobi, Samiha Al Kharusi, Abdulla Balkhair                            |
| hCoV-19/Oman/RESP-20-2282/2020  | EPI_ISL_457974 | Oman-NIC                                                                     | Samira Al-Maroufi, Fahad Zadjali, Amna Al Jardani, Khulood Al-Mammery, Hanan Al-Kindi, Fatma BaAlawi, Hamida Al Barwani, Zeyana AL-Dahmani, Intisar Al-Shukri, Aisha Al-Busaidi, Aisha Al-Amri, Aham Al-Amri, Mohammed Al-Tobi, Samiha Al Kharusi, Abdulla Balkhair                            |
| hCoV-19/Oman/RESP-20-2523/2020  | EPI_ISL_457975 | Oman-NIC                                                                     | Samira Al-Maroufi, Fahad Zadjali, Amna Al Jardani, Khulood Al-Mammery, Hanan Al-Kindi, Fatma BaAlawi, Hamida Al Barwani, Zeyana AL-Dahmani, Intisar Al-Shukri, Aisha Al-Busaidi, Aisha Al-Amri, Aham Al-Amri, Mohammed Al-Tobi, Samiha Al Kharusi, Abdulla Balkhair                            |
| hCoV-19/Oman/RESP-20-2631/2020  | EPI_ISL_457976 | Oman-NIC                                                                     | Samira Al-Maroufi, Fahad Zadjali, Amna Al Jardani, Khulood Al-Mammery, Hanan Al-Kindi, Fatma BaAlawi, Hamida Al Barwani, Zeyana AL-Dahmani, Intisar Al-Shukri, Aisha Al-Busaidi, Aisha Al-Amri, Aham Al-Amri, Mohammed Al-Tobi, Samiha Al Kharusi, Abdulla Balkhair                            |
| hCoV-19/Oman/RESP-20-2850/2020  | EPI_ISL_457977 | Oman-NIC                                                                     | Samira Al-Maroufi, Fahad Zadjali, Amna Al Jardani, Khulood Al-Mammery, Hanan Al-Kindi, Fatma BaAlawi, Hamida Al Barwani, Zeyana AL-Dahmani, Intisar Al-Shukri, Aisha Al-Busaidi, Aisha Al-Amri, Aham Al-Amri, Mohammed Al-Tobi, Samiha Al Kharusi, Abdulla Balkhair                            |
| hCoV-19/Oman/RESP-20-2857/2020  | EPI_ISL_457978 | Oman-NIC                                                                     | Samira Al-Maroufi, Fahad Zadjali, Amna Al Jardani, Khulood Al-Mammery, Hanan Al-Kindi, Fatma BaAlawi, Hamida Al Barwani, Zeyana AL-Dahmani, Intisar Al-Shukri, Aisha Al-Busaidi, Aisha Al-Amri, Aham Al-Amri, Mohammed Al-Tobi, Samiha Al Kharusi, Abdulla Balkhair                            |
| hCoV-19/Oman/RESP-20-3080/2020  | EPI_ISL_457979 | Oman-NIC                                                                     | Samira Al-Maroufi, Fahad Zadjali, Amna Al Jardani, Khulood Al-Mammery, Hanan Al-Kindi, Fatma BaAlawi, Hamida Al Barwani, Zeyana AL-Dahmani, Intisar Al-Shukri, Aisha Al-Busaidi, Aisha Al-Amri, Aham Al-Amri, Mohammed Al-Tobi, Samiha Al Kharusi, Abdulla Balkhair                            |
| hCoV-19/Oman/RESP-20-3515/2020  | EPI_ISL_457980 | Oman-NIC                                                                     | Samira Al-Maroufi, Fahad Zadjali, Amna Al Jardani, Khulood Al-Mammery, Hanan Al-Kindi, Fatma BaAlawi, Hamida Al Barwani, Zeyana AL-Dahmani, Intisar Al-Shukri, Aisha Al-Busaidi, Aisha Al-Amri, Aham Al-Amri, Mohammed Al-Tobi, Samiha Al Kharusi, Abdulla Balkhair                            |
| hCoV-19/Oman/RESP-20-3343/2020  | EPI_ISL_457985 | Oman-NIC                                                                     | Samira Al-Maroufi, Fahad Zadjali, Amna Al Jardani, Khulood Al-Mammery, Hanan Al-Kindi, Fatma BaAlawi, Hamida Al Barwani, Zeyana AL-Dahmani, Intisar Al-Shukri, Aisha Al-Busaidi, Aisha Al-Amri, Aham Al-Amri, Mohammed Al-Tobi, Samiha Al Kharusi, Abdulla Balkhair                            |
| hCoV-19/Oman/RESP-20-3700/2020  | EPI_ISL_457986 | Oman-NIC                                                                     | Samira Al-Maroufi, Fahad Zadjali, Amna Al Jardani, Khulood Al-Mammery, Hanan Al-Kindi, Fatma BaAlawi, Hamida Al Barwani, Zeyana AL-Dahmani, Intisar Al-Shukri, Aisha Al-Busaidi, Aisha Al-Amri, Aham Al-Amri, Mohammed Al-Tobi, Samiha Al Kharusi, Abdulla Balkhair                            |
| hCoV-19/Oman/RESP-20-4028/2020  | EPI_ISL_457987 | Oman-NIC                                                                     | Samira Al-Maroufi, Fahad Zadjali, Amna Al Jardani, Khulood Al-Mammery, Hanan Al-Kindi, Fatma BaAlawi, Hamida Al Barwani, Zeyana AL-Dahmani, Intisar Al-Shukri, Aisha Al-Busaidi, Aisha Al-Amri, Aham Al-Amri, Mohammed Al-Tobi, Samiha Al Kharusi, Abdulla Balkhair                            |
| hCoV-19/Oman/RESP-20-4153/2020  | EPI_ISL_457988 | Oman-NIC                                                                     | Samira Al-Maroufi, Fahad Zadjali, Amna Al Jardani, Khulood Al-Mammery, Hanan Al-Kindi, Fatma BaAlawi, Hamida Al Barwani, Zeyana AL-Dahmani, Intisar Al-Shukri, Aisha Al-Busaidi, Aisha Al-Amri, Aham Al-Amri, Mohammed Al-Tobi, Samiha Al Kharusi, Abdulla Balkhair                            |
| hCoV-19/Oman/RESP-20-4252/2020  | EPI_ISL_457989 | Oman-NIC                                                                     | Samira Al-Maroufi, Fahad Zadjali, Amna Al Jardani, Khulood Al-Mammery, Hanan Al-Kindi, Fatma BaAlawi, Hamida Al Barwani, Zeyana AL-Dahmani, Intisar Al-Shukri, Aisha Al-Busaidi, Aisha Al-Amri, Aham Al-Amri, Mohammed Al-Tobi, Samiha Al Kharusi, Abdulla Balkhair                            |
| hCoV-19/Oman/RESP-20-4400/2020  | EPI_ISL_457990 | Oman-NIC                                                                     | Samira Al-Maroufi, Fahad Zadjali, Amna Al Jardani, Khulood Al-Mammery, Hanan Al-Kindi, Fatma BaAlawi, Hamida Al Barwani, Zeyana AL-Dahmani, Intisar Al-Shukri, Aisha Al-Busaidi, Aisha Al-Amri, Aham Al-Amri, Mohammed Al-Tobi, Samiha Al Kharusi, Abdulla Balkhair                            |
| hCoV-19/Tunisia/MHT_2/2020      | EPI_ISL_458286 | unknown                                                                      | Handrik.S., Bestehani-William.M.S., Edstein.S., Walter.M.C., Antwerpen.M.H., Rehn.A., Najia.H., Stoecker.K., Woelfel.R. and Ben Moussa.M.                                                                                                                                                      |
| hCoV-19/Morocco/6887/2020       | EPI_ISL_459965 | Institut Pasteur du Maroc                                                    | Marion Barbet, Sylvie Behillil, MvDilne Bizard, Angela Brisebarre, Camille Capel, Etienne Simon-Loriv'ere, Vincent Enouf, Maud Vanpeene, Sylvie van der Werf, Latifa Anga, Abdellah Fouzi, Anass Abbad, Mjid Eloualid, Jalal Nourill, Aderhahmane Maaroufi                                     |
| hCoV-19/Morocco/6888/2020       | EPI_ISL_459966 | Institut Pasteur du Maroc                                                    | Marion Barbet, Sylvie Behillil, MvDilne Bizard, Angela Brisebarre, Camille Capel, Etienne Simon-Loriv'ere, Vincent Enouf, Maud Vanpeene, Sylvie van der Werf, Latifa Anga, Abdellah Fouzi, Anass Abbad, Mjid Eloualid, Jalal Nourill, Aderhahmane Maaroufi                                     |
| hCoV-19/Morocco/6889/2020       | EPI_ISL_459967 | Institut Pasteur du Maroc                                                    | Marion Barbet, Sylvie Behillil, MvDilne Bizard, Angela Brisebarre, Camille Capel, Etienne Simon-Loriv'ere, Vincent Enouf, Maud Vanpeene, Sylvie van der Werf, Latifa Anga, Abdellah Fouzi, Anass Abbad, Mjid Eloualid, Jalal Nourill, Aderhahmane Maaroufi                                     |
| hCoV-19/Morocco/6890/2020       | EPI_ISL_459968 | Institut Pasteur du Maroc                                                    | Marion Barbet, Sylvie Behillil, MvDilne Bizard, Angela Brisebarre, Camille Capel, Etienne Simon-Loriv'ere, Vincent Enouf, Maud Vanpeene, Sylvie van der Werf, Latifa Anga, Abdellah Fouzi, Anass Abbad, Mjid Eloualid, Jalal Nourill, Aderhahmane Maaroufi                                     |
| hCoV-19/Morocco/6894/2020       | EPI_ISL_459972 | Institut Pasteur du Maroc                                                    | Marion Barbet, Sylvie Behillil, MvDilne Bizard, Angela Brisebarre, Camille Capel, Etienne Simon-Loriv'ere, Vincent Enouf, Maud Vanpeene, Sylvie van der Werf, Latifa Anga, Abdellah Fouzi, Anass Abbad, Mjid Eloualid, Jalal Nourill, Aderhahmane Maaroufi                                     |
| hCoV-19/Morocco/6895/2020       | EPI_ISL_459973 | Institut Pasteur du Maroc                                                    | Marion Barbet, Sylvie Behillil, MvDilne Bizard, Angela Brisebarre, Camille Capel, Etienne Simon-Loriv'ere, Vincent Enouf, Maud Vanpeene, Sylvie van der Werf, Latifa Anga, Abdellah Fouzi, Anass Abbad, Mjid Eloualid, Jalal Nourill, Aderhahmane Maaroufi                                     |
| hCoV-19/Morocco/6896/2020       | EPI_ISL_459974 | Institut Pasteur du Maroc                                                    | Marion Barbet, Sylvie Behillil, MvDilne Bizard, Angela Brisebarre, Camille Capel, Etienne Simon-Loriv'ere, Vincent Enouf, Maud Vanpeene, Sylvie van der Werf, Latifa Anga, Abdellah Fouzi, Anass Abbad, Mjid Eloualid, Jalal Nourill, Aderhahmane Maaroufi                                     |
| hCoV-19/Morocco/6898/2020       | EPI_ISL_459976 | Institut Pasteur du Maroc                                                    | Marion Barbet, Sylvie Behillil, MvDilne Bizard, Angela Brisebarre, Camille Capel, Etienne Simon-Loriv'ere, Vincent Enouf, Maud Vanpeene, Sylvie van der Werf, Latifa Anga, Abdellah Fouzi, Anass Abbad, Mjid Eloualid, Jalal Nourill, Aderhahmane Maaroufi                                     |
| hCoV-19/Morocco/6906/2020       | EPI_ISL_459984 | Institut Pasteur du Maroc                                                    | Marion Barbet, Sylvie Behillil, MvDilne Bizard, Angela Brisebarre, Camille Capel, Etienne Simon-Loriv'ere, Vincent Enouf, Maud Vanpeene, Sylvie van der Werf, Latifa Anga, Abdellah Fouzi, Anass Abbad, Mjid Eloualid, Jalal Nourill, Aderhahmane Maaroufi                                     |
| hCoV-19/Tunisia/COV0010-12/2020 | EPI_ISL_463001 | unknown                                                                      | Fares.W., Triki.H.                                                                                                                                                                                                                                                                             |
| hCoV-19/Tunisia/COV0880/2020    | EPI_ISL_463002 | unknown                                                                      | Fares.W., Triki.H.                                                                                                                                                                                                                                                                             |
| hCoV-19/Tunisia/COV1339/2020    | EPI_ISL_463003 | unknown                                                                      | Fares.W., Triki.H.                                                                                                                                                                                                                                                                             |
| hCoV-19/Tunisia/COV1663/2020    | EPI_ISL_463004 | unknown                                                                      | Fares.W., Triki.H.                                                                                                                                                                                                                                                                             |
| hCoV-19/Tunisia/COV0425/2020    | EPI_ISL_463005 | unknown                                                                      | Fares.W., Triki.H.                                                                                                                                                                                                                                                                             |
| hCoV-19/Tunisia/COV1482/2020    | EPI_ISL_463006 | unknown                                                                      | Fares.W., Triki.H.                                                                                                                                                                                                                                                                             |
| hCoV-19/Egypt/CUNCI-HGC002/2020 | EPI_ISL_468045 | Egyptian National Cancer Institute (ENCI)                                    | Zekri, Abdel Rahman N., Amer.K.E., Ahmed.O.S., Soliman.H.K., Hafez.M.M., Bahnassy.A.A., Abdelhamid.W., Gad.A., Ali.M., Hassan.W., Samir.M., Raouf.A., Hamdy.M.S., Soliman.M.S., Elsisy.M.H., Elkhatteeb.S.M., Ezzelarab.M.H., Abouelhoda, Mohamed                                              |
| hCoV-19/Egypt/CUNCI-HGC007/2020 | EPI_ISL_468046 | Egyptian National Cancer Institute (ENCI)                                    | Zekri, Abdel Rahman N., Amer.K.E., Ahmed.O.S., Soliman.H.K., Hafez.M.M., Bahnassy.A.A., Abdelhamid.W., Gad.A., Ali.M., Hassan.W., Samir.M., Raouf.A., Hamdy.M.S., Soliman.M.S., Elsisy.M.H., Elkhatteeb.S.M., Ezzelarab.M.H., Abouelhoda, Mohamed                                              |
| hCoV-19/Egypt/CUNCI-HGC013/2020 | EPI_ISL_468047 | Egyptian National Cancer Institute (ENCI)                                    | Zekri, Abdel Rahman N., Amer.K.E., Ahmed.O.S., Soliman.H.K., Hafez.M.M., Bahnassy.A.A., Abdelhamid.W., Gad.A., Ali.M., Hassan.W., Samir.M., Raouf.A., Hamdy.M.S., Soliman.M.S., Elsisy.M.H., Elkhatteeb.S.M., Ezzelarab.M.H., Abouelhoda, Mohamed                                              |
| hCoV-19/Egypt/CUNCI-HGC003/2020 | EPI_ISL_468049 | Egyptian National Cancer Institute (ENCI)                                    | Zekri, Abdel Rahman N., Amer.K.E., Ahmed.O.S., Soliman.H.K., Hafez.M.M., Bahnassy.A.A., Abdelhamid.W., Gad.A., Ali.M., Hassan.W., Samir.M., Raouf.A., Hamdy.M.S., Soliman.M.S., Elsisy.M.H., Elkhatteeb.S.M., Ezzelarab.M.H., Abouelhoda, Mohamed                                              |
| hCoV-19/Egypt/CUNCI-HGC028/2020 | EPI_ISL_468062 | Egyptian National Cancer Institute (ENCI)                                    | Zekri, Abdel Rahman N., Amer.K.E., Ahmed.O.S., Soliman.H.K., Hafez.M.M., Bahnassy.A.A., Abdelhamid.W., Gad.A., Ali.M., Hassan.W., Samir.M., Raouf.A., Hamdy.M.S., Soliman.M.S., Elsisy.M.H., Elkhatteeb.S.M., Ezzelarab.M.H., Abouelhoda, Mohamed                                              |
| hCoV-19/Morocco/RMPS-02/2020    | EPI_ISL_469049 | LNR National Reference Laboratory, Mohammed VI University of Health Sciences | Meriem LAAMARTI, Souad KARTI, Rokai LAAMRTI, M.W. CHEMAO-ELFIRI, Louba ALLAM, Mouna OUAUGHIRI, Imane SMYEJ, Jallia RAHOUI, Houda BENRAHMA, Jalil El Atar, Idrissa Diawara, Rachid EL JAQUDI, Laila SBABOU, Chabik NEJJARI, Saaid AMZAZI, Rachid MENTAG, Lahcen BELYAMANI and Azeddine IBRAHIMI |
| hCoV-19/Morocco/RMPS-03/2020    | EPI_ISL_469051 | LNR National Reference Laboratory, Mohammed VI University of Health Sciences | Meriem LAAMARTI, Souad KARTI, Rokai LAAMRTI, M.W. CHEMAO-ELFIRI, Louba ALLAM, Mouna OUAUGHIRI, Imane SMYEJ, Jallia RAHOUI, Houda BENRAHMA, Jalil El Atar, Idrissa Diawara, Rachid EL JAQUDI, Laila SBABOU, Chabik NEJJARI, Saaid AMZAZI, Rachid MENTAG, Lahcen BELYAMANI and Azeddine IBRAHIMI |

|                                     |                 |                                                                              |                                                                                                                                                                                                                                                                                                                                                    |
|-------------------------------------|-----------------|------------------------------------------------------------------------------|----------------------------------------------------------------------------------------------------------------------------------------------------------------------------------------------------------------------------------------------------------------------------------------------------------------------------------------------------|
| hCoV-19/Morocco/RMPS-04/2020        | EPI_ISL_469052  | LNR National Reference Laboratory, Mohammed VI University of Health Sciences | Meriem LAAMARTI, Souad KARTIT, Rokila LAAMRTI, M.W. CHEMAO-ELFIRI, Louba ALLAM, Mouna OUAADGHIRI, Imane SMYEI, Jallia RAHOUI, Houba BENRAHMA, Jallil El Atar, Drissia Diawara, Rachid EL JAOUIDI, Laila SBAOUI, Chakib NEJJARI, Saaid AMZAZI, Rachid MENTAG, Lahcen BELYAMANI and Azeddine IBRAHIMI                                                |
| hCoV-19/Morocco/RMPS-05/2020        | EPI_ISL_469053  | LNR National Reference Laboratory, Mohammed VI University of Health Sciences | Meriem LAAMARTI, Souad KARTIT, Rokila LAAMRTI, M.W. CHEMAO-ELFIRI, Louba ALLAM, Mouna OUAADGHIRI, Imane SMYEI, Jallia RAHOUI, Houba BENRAHMA, Jallil El Atar, Drissia Diawara, Rachid EL JAOUIDI, Laila SBAOUI, Chakib NEJJARI, Saaid AMZAZI, Rachid MENTAG, Lahcen BELYAMANI and Azeddine IBRAHIMI                                                |
| hCoV-19/Morocco/RMPS-06/2020        | EPI_ISL_469054  | LNR National Reference Laboratory, Mohammed VI University of Health Sciences | Meriem LAAMARTI, Souad KARTIT, Rokila LAAMRTI, M.W. CHEMAO-ELFIRI, Louba ALLAM, Mouna OUAADGHIRI, Imane SMYEI, Jallia RAHOUI, Houba BENRAHMA, Jallil El Atar, Drissia Diawara, Rachid EL JAOUIDI, Laila SBAOUI, Chakib NEJJARI, Saaid AMZAZI, Rachid MENTAG, Lahcen BELYAMANI and Azeddine IBRAHIMI                                                |
| hCoV-19/Morocco/HMIMV-Rabat102-03   | EPI_ISL_471456  | Centre de Virologie des Maladies Tropicales                                  | Hicham EL ANNAZ, Elmostafa EL FAHIME, Marouane MELLOUL, Youssef AKHOUDJ, Miy Abdelaziz ELALAOUI, Ahmed REGGAD, Sanaa ALAOUI-Amine, Rachid ABI, Rida TAGADID, Zohour KASMY, Safae ELKOCHE, Nadia TOULI, Farida HIALI, Abdelkader LAATIRIS, Abdellah LARAQI, Tahar BAJJOU, Yassine SEKHSOKH, Idriss-Amine LAHLOU, Mostafa ELLOUENNASS, Khalid ENNIBI |
| hCoV-19/Morocco/refstage1/2020      | EPI_ISL_476559  | unknown                                                                      | Hajar Lemriss, SanavC Lemriss, Amal Souiri, Narjis Amar, Mustapha Moulalif, Touria Essayagh, Jawad Bouzid, SaVed EL Kabbaj, Abderraouf Hlali                                                                                                                                                                                                       |
| hCoV-19/Egypt/MASRI-005/2020        | EPI_ISL_482759  | Medical Ain Shams Research Institute (MASRI), Ain Shams University           | Hesham Elghazaly, Sara Hassan Agwa, Ahmad Moustafa, Hala Hafez, Sara Elnakeep, Shaimaa Moustafa, Aya Mohamed, Reham Mamdouh, Ghada Ismael, Ashraf Omar, Osama Mansour, Mahmoud Elmettini                                                                                                                                                           |
| hCoV-19/Egypt/MASRI-007/2020        | EPI_ISL_482760  | Medical Ain Shams Research Institute (MASRI), Ain Shams University           | Hesham Elghazaly, Sara Hassan Agwa, Ahmad Moustafa, Hala Hafez, Sara Elnakeep, Shaimaa Moustafa, Aya Mohamed, Reham Mamdouh, Ghada Ismael, Ashraf Omar, Osama Mansour, Mahmoud Elmettini                                                                                                                                                           |
| hCoV-19/Egypt/MASRI-008/2020        | EPI_ISL_482761  | Medical Ain Shams Research Institute (MASRI), Ain Shams University           | Hesham Elghazaly, Sara Hassan Agwa, Ahmad Moustafa, Hala Hafez, Sara Elnakeep, Shaimaa Moustafa, Aya Mohamed, Reham Mamdouh, Ghada Ismael, Ashraf Omar, Osama Mansour, Mahmoud Elmettini                                                                                                                                                           |
| hCoV-19/Egypt/MASRI-014/2020        | EPI_ISL_482765  | Medical Ain Shams Research Institute (MASRI), Ain Shams University           | Hesham Elghazaly, Sara Hassan Agwa, Ahmad Moustafa, Hala Hafez, Sara Elnakeep, Shaimaa Moustafa, Aya Mohamed, Reham Mamdouh, Ghada Ismael, Ashraf Omar, Osama Mansour, Mahmoud Elmettini                                                                                                                                                           |
| hCoV-19/Egypt/MASRI-009/2020        | EPI_ISL_483035  | Medical Ain Shams Research Institute (MASRI), Ain Shams University           | Hesham Elghazaly, Sara Hassan Agwa, Ahmad Moustafa, Hala Hafez, Sara Elnakeep, Shaimaa Moustafa, Aya Mohamed, Reham Mamdouh, Ghada Ismael, Ashraf Omar, Osama Mansour, Mahmoud Elmettini                                                                                                                                                           |
| hCoV-19/Morocco/INH-101/2020        | EPI_ISL_4899863 | Laboratoire de virologie                                                     | Hicham Oumzil, Mohamed Rhajouli, Fatima Elfalaki, Hassan Ihamad, Abderrahmane Bimouhen, Zakia Regragui, Samira Benkeroum, Marouane Melloul, Sanaa Alaoui-Amine, Safae Ghoulame, Taha Chouati, Moushine Hentali, Hamza Gharraz, Elmostafa El Fahime                                                                                                 |
| hCoV-19/Morocco/INH-103/2020        | EPI_ISL_4899870 | Laboratoire de virologie                                                     | Hicham Oumzil, Mohamed Rhajouli, Fatima Elfalaki, Hassan Ihamad, Abderrahmane Bimouhen, Zakia Regragui, Samira Benkeroum, Marouane Melloul, Sanaa Alaoui-Amine, Safae Ghoulame, Taha Chouati, Moushine Hentali, Hamza Gharraz, Elmostafa El Fahime                                                                                                 |
| hCoV-19/Morocco/INH-104/2020        | EPI_ISL_4899881 | Laboratoire de virologie                                                     | Hicham Oumzil, Mohamed Rhajouli, Fatima Elfalaki, Hassan Ihamad, Abderrahmane Bimouhen, Zakia Regragui, Samira Benkeroum, Marouane Melloul, Sanaa Alaoui-Amine, Safae Ghoulame, Taha Chouati, Moushine Hentali, Hamza Gharraz, Elmostafa El Fahime                                                                                                 |
| hCoV-19/Morocco/INH-105/2020        | EPI_ISL_4899888 | Laboratoire de virologie                                                     | Hicham Oumzil, Mohamed Rhajouli, Fatima Elfalaki, Hassan Ihamad, Abderrahmane Bimouhen, Zakia Regragui, Samira Benkeroum, Marouane Melloul, Sanaa Alaoui-Amine, Safae Ghoulame, Taha Chouati, Moushine Hentali, Hamza Gharraz, Elmostafa El Fahime                                                                                                 |
| hCoV-19/Morocco/INH-MN908947/2020   | EPI_ISL_4899917 | Laboratoire de virologie                                                     | Mohamed Rhajouli, Hicham Oumzil, Fatima Elfalaki, Hassan Ihamad, Abderrahmane Bimouhen, Zakia Regragui, Samira Benkeroum, Marouane Melloul, Sanaa Alaoui-Amine, Safae Ghoulame, Taha Chouati, Moushine Hentali, Hamza Gharraz, Elmostafa El Fahime                                                                                                 |
| hCoV-19/SaudiArabia/477/2020        | EPI_ISL_489996  | King Fahad Medical City                                                      | Alosaimi,B., Naeem,A., Alghoraihi,M., Enani,M.                                                                                                                                                                                                                                                                                                     |
| hCoV-19/SaudiArabia/492/2020        | EPI_ISL_489997  | King Fahad Medical City                                                      | Alosaimi,B., Naeem,A., Alghoraihi,M., Enani,M.                                                                                                                                                                                                                                                                                                     |
| hCoV-19/SaudiArabia/509/2020        | EPI_ISL_489998  | King Fahad Medical City                                                      | Alosaimi,B., Naeem,A., Alghoraihi,M., Enani,M.                                                                                                                                                                                                                                                                                                     |
| hCoV-19/SaudiArabia/518/2020        | EPI_ISL_489999  | King Fahad Medical City                                                      | Alosaimi,B., Naeem,A., Alghoraihi,M., Enani,M.                                                                                                                                                                                                                                                                                                     |
| hCoV-19/SaudiArabia/523/2020        | EPI_ISL_490000  | King Fahad Medical City                                                      | Alosaimi,B., Naeem,A., Alghoraihi,M., Enani,M.                                                                                                                                                                                                                                                                                                     |
| hCoV-19/SaudiArabia/545/2020        | EPI_ISL_490001  | King Fahad Medical City                                                      | Alosaimi,B., Naeem,A., Alghoraihi,M., Enani,M.                                                                                                                                                                                                                                                                                                     |
| hCoV-19/SaudiArabia/553/2020        | EPI_ISL_490002  | King Fahad Medical City                                                      | Alosaimi,B., Naeem,A., Alghoraihi,M., Enani,M.                                                                                                                                                                                                                                                                                                     |
| hCoV-19/SaudiArabia/562/2020        | EPI_ISL_490003  | King Fahad Medical City                                                      | Alosaimi,B., Naeem,A., Alghoraihi,M., Enani,M.                                                                                                                                                                                                                                                                                                     |
| hCoV-19/SaudiArabia/578/2020        | EPI_ISL_490004  | King Fahad Medical City                                                      | Alosaimi,B., Naeem,A., Alghoraihi,M., Enani,M.                                                                                                                                                                                                                                                                                                     |
| hCoV-19/SaudiArabia/583/2020        | EPI_ISL_490005  | King Fahad Medical City                                                      | Alosaimi,B., Naeem,A., Alghoraihi,M., Enani,M.                                                                                                                                                                                                                                                                                                     |
| hCoV-19/SaudiArabia/596/2020        | EPI_ISL_490006  | King Fahad Medical City                                                      | Alosaimi,B., Naeem,A., Alghoraihi,M., Enani,M.                                                                                                                                                                                                                                                                                                     |
| hCoV-19/SaudiArabia/610/2020        | EPI_ISL_490007  | King Fahad Medical City                                                      | Alosaimi,B., Naeem,A., Alghoraihi,M., Enani,M.                                                                                                                                                                                                                                                                                                     |
| hCoV-19/SaudiArabia/627/2020        | EPI_ISL_490008  | King Fahad Medical City                                                      | Alosaimi,B., Naeem,A., Alghoraihi,M., Enani,M.                                                                                                                                                                                                                                                                                                     |
| hCoV-19/SaudiArabia/640/2020        | EPI_ISL_490009  | King Fahad Medical City                                                      | Alosaimi,B., Naeem,A., Alghoraihi,M., Enani,M.                                                                                                                                                                                                                                                                                                     |
| hCoV-19/SaudiArabia/656/2020        | EPI_ISL_490010  | King Fahad Medical City                                                      | Alosaimi,B., Naeem,A., Alghoraihi,M., Enani,M.                                                                                                                                                                                                                                                                                                     |
| hCoV-19/SaudiArabia/671/2020        | EPI_ISL_490011  | King Fahad Medical City                                                      | Alosaimi,B., Naeem,A., Alghoraihi,M., Enani,M.                                                                                                                                                                                                                                                                                                     |
| hCoV-19/SaudiArabia/677/2020        | EPI_ISL_490012  | King Fahad Medical City                                                      | Alosaimi,B., Naeem,A., Alghoraihi,M., Enani,M.                                                                                                                                                                                                                                                                                                     |
| hCoV-19/SaudiArabia/KAIMRC01/2020   | EPI_ISL_507010  | unknown                                                                      | Alghoraihi,M.F.                                                                                                                                                                                                                                                                                                                                    |
| hCoV-19/Oman/RESP-20-4395/2020      | EPI_ISL_518822  | Oman-National Influenza Center                                               | Samira Al-Mahrueq, Abdul Latif Khan, Samiha Al-Kharusi, Adil Khan , Ahmed Al-Rawahi, Sajjad Asaf, Amina Al-Jardani, Hanan Al-Kindi, Intisar Al-Shukri, Adil Al-Wahabi, Seif Al-Abri, Ahmed Al-Herrazi                                                                                                                                              |
| hCoV-19/Iraq/ICGEB-5T/2020          | EPI_ISL_582030  | Biology Department, College of Science, Al-Muthanna University               | Nihad Al-Rashedi, Danilo Licastro, Sreejith Rajasekharan, Simeone Dal Monego, Alessandro Marcello                                                                                                                                                                                                                                                  |
| hCoV-19/Iran/GRC-1600/2020          | EPI_ISL_582033  | Department of Pathology, School of Medicine, Imam Khomeini Hospital, Tehr    | Zohreh Fattahi, Marzieh Mohseni, Khadijeh Jalalvand, Azam Ghaziassadi, Seyedeh elham Mortazavi, Ali Jafarpour, Azar Hadadi, Alireza Abdollahi, Saber Soltani, Reza Najafipour, Kimia Kahrizi, Seyed Mohammad Jazayeri, Hossein Najmabadi                                                                                                           |
| hCoV-19/UnitedArabEmirates/skmc-920 | EPI_ISL_582125  | Sheikh Khalifa Medical City                                                  | Amirtharaj Francis, Sajeed Abdul, Hala Imambaccus, Sahar Almarzooq, Hiba Saud, Stefan Weber                                                                                                                                                                                                                                                        |
| hCoV-19/UnitedArabEmirates/skmc-920 | EPI_ISL_582126  | Sheikh Khalifa Medical City                                                  | Amirtharaj Francis, Sajeed Abdul, Hala Imambaccus, Sahar Almarzooq, Hiba Saud, Stefan Weber                                                                                                                                                                                                                                                        |
| hCoV-19/UnitedArabEmirates/skmc-920 | EPI_ISL_582608  | Sheikh Khalifa Medical City                                                  | Amirtharaj Francis, Sajeed Abdul, Hala Imambaccus, Sahar Almarzooq, Hiba Saud, Stefan Weber                                                                                                                                                                                                                                                        |
| hCoV-19/UnitedArabEmirates/skmc-004 | EPI_ISL_582613  | Sheikh Khalifa Medical City                                                  | Amirtharaj Francis, Sajeed Abdul, Hala Imambaccus, Sahar Almarzooq, Hiba Saud, Stefan Weber                                                                                                                                                                                                                                                        |
| hCoV-19/UnitedArabEmirates/skmc-053 | EPI_ISL_582620  | Sheikh Khalifa Medical City                                                  | Amirtharaj Francis, Sajeed Abdul, Hala Imambaccus, Sahar Almarzooq, Hiba Saud, Stefan Weber                                                                                                                                                                                                                                                        |
| hCoV-19/UnitedArabEmirates/skmc-001 | EPI_ISL_582624  | Sheikh Khalifa Medical City                                                  | Amirtharaj Francis, Sajeed Abdul, Hala Imambaccus, Sahar Almarzooq, Hiba Saud, Stefan Weber                                                                                                                                                                                                                                                        |
| hCoV-19/UnitedArabEmirates/skmc-003 | EPI_ISL_582625  | Sheikh Khalifa Medical City                                                  | Amirtharaj Francis, Sajeed Abdul, Hala Imambaccus, Sahar Almarzooq, Hiba Saud, Stefan Weber                                                                                                                                                                                                                                                        |
| hCoV-19/Iran/GRC-1325/2020          | EPI_ISL_594186  | Department of Pathology, School of Medicine, Imam Khomeini Hospital, Tehr    | Zohreh Fattahi, Marzieh Mohseni, Khadijeh Jalalvand, Azam Ghaziassadi, Seyedeh elham Mortazavi, Ali Jafarpour, Azar Hadadi, Alireza Abdollahi, Saber Soltani, Reza Najafipour, Kimia Kahrizi, Seyed Mohammad Jazayeri, Hossein Najmabadi                                                                                                           |
| hCoV-19/Iran/GRC-43/2020            | EPI_ISL_596453  | Booali laboratory, Qom, Iran                                                 | Zohreh Fattahi, Marzieh Mohseni, Khadijeh Jalalvand, Azam Ghaziassadi, Seyedeh elham Mortazavi, Ali Jafarpour, Mohammad Khazeni, Seyed Amir Momeni, Kimia Kahrizi, Seyed Mohammad Jazayeri, Hossein Najmabadi                                                                                                                                      |
| hCoV-19/Iran/GRC-70/2020            | EPI_ISL_596454  | Infectious Disease and Tropical Medicine Research Center, Resistant Tubercu  | Zohreh Fattahi, Marzieh Mohseni, Khadijeh Jalalvand, Azam Ghaziassadi, Seyedeh elham Mortazavi, Ali Jafarpour, Ebrahim Kord, Seyed Mohammad Hashemi-Shahri, Kimia Kahrizi, Seyed Mohammad Jazayeri, Hossein Najmabadi                                                                                                                              |

|                                  |                |                                                                                |                                                                                                                                                                                                                                                                                                                    |
|----------------------------------|----------------|--------------------------------------------------------------------------------|--------------------------------------------------------------------------------------------------------------------------------------------------------------------------------------------------------------------------------------------------------------------------------------------------------------------|
| hCoV-19/Palestine/13/2020        | EPI_ISL_596502 | Palestinian Ministry of Health                                                 | Nouar Qutob, Zaidoun Salah, Damien Richard, Hisham Darwish, Husam Sallam, Issa Shtayah, Osama Najjar, Mahmoud Ruzayqat, Dana Najjar, Francois Balloux, Lucy van Dorp                                                                                                                                               |
| hCoV-19/Palestine/14/2020        | EPI_ISL_596503 | Palestinian Ministry of Health                                                 | Nouar Qutob, Zaidoun Salah, Damien Richard, Hisham Darwish, Husam Sallam, Issa Shtayah, Osama Najjar, Mahmoud Ruzayqat, Dana Najjar, Francois Balloux, Lucy van Dorp                                                                                                                                               |
| hCoV-19/Palestine/15/2020        | EPI_ISL_596504 | Palestinian Ministry of Health                                                 | Nouar Qutob, Zaidoun Salah, Damien Richard, Hisham Darwish, Husam Sallam, Issa Shtayah, Osama Najjar, Mahmoud Ruzayqat, Dana Najjar, Francois Balloux, Lucy van Dorp                                                                                                                                               |
| hCoV-19/Palestine/19/2020        | EPI_ISL_596506 | Palestinian Ministry of Health                                                 | Nouar Qutob, Zaidoun Salah, Damien Richard, Hisham Darwish, Husam Sallam, Issa Shtayah, Osama Najjar, Mahmoud Ruzayqat, Dana Najjar, Francois Balloux, Lucy van Dorp                                                                                                                                               |
| hCoV-19/Palestine/21/2020        | EPI_ISL_596508 | Palestinian Ministry of Health                                                 | Nouar Qutob, Zaidoun Salah, Damien Richard, Hisham Darwish, Husam Sallam, Issa Shtayah, Osama Najjar, Mahmoud Ruzayqat, Dana Najjar, Francois Balloux, Lucy van Dorp                                                                                                                                               |
| hCoV-19/Palestine/22/2020        | EPI_ISL_596509 | Palestinian Ministry of Health                                                 | Nouar Qutob, Zaidoun Salah, Damien Richard, Hisham Darwish, Husam Sallam, Issa Shtayah, Osama Najjar, Mahmoud Ruzayqat, Dana Najjar, Francois Balloux, Lucy van Dorp                                                                                                                                               |
| hCoV-19/Palestine/23/2020        | EPI_ISL_596510 | Palestinian Ministry of Health                                                 | Nouar Qutob, Zaidoun Salah, Damien Richard, Hisham Darwish, Husam Sallam, Issa Shtayah, Osama Najjar, Mahmoud Ruzayqat, Dana Najjar, Francois Balloux, Lucy van Dorp                                                                                                                                               |
| hCoV-19/Palestine/24/2020        | EPI_ISL_596511 | Palestinian Ministry of Health                                                 | Nouar Qutob, Zaidoun Salah, Damien Richard, Hisham Darwish, Husam Sallam, Issa Shtayah, Osama Najjar, Mahmoud Ruzayqat, Dana Najjar, Francois Balloux, Lucy van Dorp                                                                                                                                               |
| hCoV-19/Palestine/28/2020        | EPI_ISL_596512 | Palestinian Ministry of Health                                                 | Nouar Qutob, Zaidoun Salah, Damien Richard, Hisham Darwish, Husam Sallam, Issa Shtayah, Osama Najjar, Mahmoud Ruzayqat, Dana Najjar, Francois Balloux, Lucy van Dorp                                                                                                                                               |
| hCoV-19/Palestine/29/2020        | EPI_ISL_596513 | Palestinian Ministry of Health                                                 | Nouar Qutob, Zaidoun Salah, Damien Richard, Hisham Darwish, Husam Sallam, Issa Shtayah, Osama Najjar, Mahmoud Ruzayqat, Dana Najjar, Francois Balloux, Lucy van Dorp                                                                                                                                               |
| hCoV-19/Palestine/30/2020        | EPI_ISL_596515 | Palestinian Ministry of Health                                                 | Nouar Qutob, Zaidoun Salah, Damien Richard, Hisham Darwish, Husam Sallam, Issa Shtayah, Osama Najjar, Mahmoud Ruzayqat, Dana Najjar, Francois Balloux, Lucy van Dorp                                                                                                                                               |
| hCoV-19/Palestine/31/2020        | EPI_ISL_596516 | Palestinian Ministry of Health                                                 | Nouar Qutob, Zaidoun Salah, Damien Richard, Hisham Darwish, Husam Sallam, Issa Shtayah, Osama Najjar, Mahmoud Ruzayqat, Dana Najjar, Francois Balloux, Lucy van Dorp                                                                                                                                               |
| hCoV-19/Palestine/32/2020        | EPI_ISL_596517 | Palestinian Ministry of Health                                                 | Nouar Qutob, Zaidoun Salah, Damien Richard, Hisham Darwish, Husam Sallam, Issa Shtayah, Osama Najjar, Mahmoud Ruzayqat, Dana Najjar, Francois Balloux, Lucy van Dorp                                                                                                                                               |
| hCoV-19/Palestine/33/2020        | EPI_ISL_596518 | Palestinian Ministry of Health                                                 | Nouar Qutob, Zaidoun Salah, Damien Richard, Hisham Darwish, Husam Sallam, Issa Shtayah, Osama Najjar, Mahmoud Ruzayqat, Dana Najjar, Francois Balloux, Lucy van Dorp                                                                                                                                               |
| hCoV-19/Palestine/66/2020        | EPI_ISL_596543 | Palestinian Ministry of Health                                                 | Nouar Qutob, Zaidoun Salah, Damien Richard, Hisham Darwish, Husam Sallam, Issa Shtayah, Osama Najjar, Mahmoud Ruzayqat, Dana Najjar, Francois Balloux, Lucy van Dorp                                                                                                                                               |
| hCoV-19/Palestine/84/2020        | EPI_ISL_596558 | Palestinian Ministry of Health                                                 | Nouar Qutob, Zaidoun Salah, Damien Richard, Hisham Darwish, Husam Sallam, Issa Shtayah, Osama Najjar, Mahmoud Ruzayqat, Dana Najjar, Francois Balloux, Lucy van Dorp                                                                                                                                               |
| hCoV-19/Palestine/86/2020        | EPI_ISL_596559 | Palestinian Ministry of Health                                                 | Nouar Qutob, Zaidoun Salah, Damien Richard, Hisham Darwish, Husam Sallam, Issa Shtayah, Osama Najjar, Mahmoud Ruzayqat, Dana Najjar, Francois Balloux, Lucy van Dorp                                                                                                                                               |
| hCoV-19/Palestine/87/2020        | EPI_ISL_596560 | Palestinian Ministry of Health                                                 | Nouar Qutob, Zaidoun Salah, Damien Richard, Hisham Darwish, Husam Sallam, Issa Shtayah, Osama Najjar, Mahmoud Ruzayqat, Dana Najjar, Francois Balloux, Lucy van Dorp                                                                                                                                               |
| hCoV-19/Palestine/88/2020        | EPI_ISL_596561 | Palestinian Ministry of Health                                                 | Nouar Qutob, Zaidoun Salah, Damien Richard, Hisham Darwish, Husam Sallam, Issa Shtayah, Osama Najjar, Mahmoud Ruzayqat, Dana Najjar, Francois Balloux, Lucy van Dorp                                                                                                                                               |
| hCoV-19/Palestine/90/2020        | EPI_ISL_596563 | Palestinian Ministry of Health                                                 | Nouar Qutob, Zaidoun Salah, Damien Richard, Hisham Darwish, Husam Sallam, Issa Shtayah, Osama Najjar, Mahmoud Ruzayqat, Dana Najjar, Francois Balloux, Lucy van Dorp                                                                                                                                               |
| hCoV-19/Egypt/C-CEIRS-19MOH/2020 | EPI_ISL_605780 | CEIRS Data Processing and Coordinating Center, St. Jude Center of Excellence   | Roshdy,W.H., Kayed,A.E., Naguib,A., Kamel,M.N., El-Taweel,A., El-Shesheny,R., Kandeil,A., Mostafa,A., Shehata,M., Gomaa,M., Mahmoud,S.H., Moatasm,Y., Kutkat,O., Mahrous,N., El-Sayed,M., Showky,S., El-Guindy,N.M., Webby,R., Kayali,G., Ali,M.A.                                                                 |
| hCoV-19/Iran/Q100/2020           | EPI_ISL_637099 | Indian Council of Medical Research-National Institute of Virology,-*Microbia   | Pragya D. Yadav, Gururaj Rao Deshpande,Padinjarematthil Thankappan Ullas, Varsha Potdar, Prasad Sarkale,Dimpal A. Nyayanit,Anita Shete-Aich,Pritya Abraham                                                                                                                                                         |
| hCoV-19/Iran/NIV-P1-Q100/2020    | EPI_ISL_637100 | Indian Council of Medical Research-National Institute of Virology,-*Microbia   | Pragya D. Yadav,Prasad Sarkale, Gururaj Rao Deshpande,Padinjarematthil Thankappan Ullas, Varsha Potdar, Dimpal A. Nyayanit,Anita Shete-Aich,Pritya Abraham                                                                                                                                                         |
| hCoV-19/Iran/NIV-P2-Q100/2020    | EPI_ISL_637101 | Indian Council of Medical Research-National Institute of Virology,-*Microbia   | Pragya D. Yadav,Prasad Sarkale, Gururaj Rao Deshpande,Padinjarematthil Thankappan Ullas, Varsha Potdar, Dimpal A. Nyayanit,Anita Shete-Aich,Pritya Abraham                                                                                                                                                         |
| hCoV-19/Tunisia/3913/2020        | EPI_ISL_654016 | Laboratory of Microbiology, National Reference Lab, Charles Nicolle Hospital   | Ithem Boutiba-Ben Boubaker, Sameh Trabelsi, Nissaf Ben Alaya, Maher Kharrat, Ala Ben Kahla, Jallia Ben Khelli, Salma Abid, Sana Ferjani, Mouna Ben Sassi, Mouna Safer, Imen Mkada, Imen Kaem, Gales Emma, Soumaya Rammeh, Riadh Daghfous, Riadh Gouider.                                                           |
| hCoV-19/Tunisia/4107/2020        | EPI_ISL_683329 | 1-Laboratory of Microbiology, National Reference Lab, Charles Nicolle Hospital | Ithem Boutiba-Ben Boubaker, Sameh Trabelsi, Nissaf Ben Alaya, Maher Kharrat, Ala Ben Kahla, Jallia Ben Khelli, Salma Abid, Sana Ferjani, Asma Ferjani, Mouna Ben Sassi, Mouna Safer, Guedi Berrabeh,Salwa Mrabet, Hanen Eliebari, Gales Emma, Riadh Daghfous, Riadh Gouider.                                       |
| hCoV-19/Tunisia/3944/2020        | EPI_ISL_699657 | 1-Laboratory of Microbiology, National Reference Lab, Charles Nicolle Hospital | Ithem Boutiba-Ben Boubaker, Sameh Trabelsi, Nissaf Ben Alaya, Maher Kharrat, Ala Ben Kahla, Jallia Ben Khelli, Salma Abid, Sana Ferjani, Asma Ferjani, Mouna Ben Sassi, Mouna Safer, Guedi Berrabeh,Salwa Mrabet, Hanen Eliebari, Gales Emma, Riadh Daghfous, Riadh Gouider.                                       |
| hCoV-19/Tunisia/2909/2020        | EPI_ISL_707791 | 1-Laboratory of Microbiology, National Reference Lab, Charles Nicolle Hospital | Ithem Boutiba-Ben Boubaker, Sameh Trabelsi, Nissaf Ben Alaya, Maher Kharrat, Ala Ben Kahla, Jallia Ben Khelli, Salma Abid, Sana Ferjani, Mouna Ben Sassi, Mouna Safer, Awatef El Moussi, Habiba Ben Romdhane, Souissi Amira, Ines Mdini, Hanen El Jebari, Asma Ferjani, Gales Emma, Riadh Daghfous, Riadh Gouider. |
| hCoV-19/Tunisia/6736/2020        | EPI_ISL_707792 | 1-Laboratory of Microbiology, National Reference Lab, Charles Nicolle Hospital | Ithem Boutiba-Ben Boubaker, Sameh Trabelsi, Nissaf Ben Alaya, Maher Kharrat, Ala Ben Kahla, Jallia Ben Khelli, Salma Abid, Sana Ferjani, Mouna Ben Sassi, Mouna Safer, Awatef El Moussi, Habiba Ben Romdhane, Souissi Amira, Ines Mdini, Hanen El Jebari, Asma Ferjani, Gales Emma, Riadh Daghfous, Riadh Gouider. |
| hCoV-19/Tunisia/6895/2020        | EPI_ISL_763065 | 1-Laboratory of Microbiology, National Reference Lab, Charles Nicolle Hospital | Ithem Boutiba-Ben Boubaker, Sameh Trabelsi, Nissaf Ben Alaya, Maher Kharrat, Ala Ben Kahla, Jallia Ben Khelli, Salma Abid, Sana Ferjani, Mouna Ben Sassi, Mouna Safer, Awatef El Moussi, Habiba Ben Romdhane, Souissi Amira, Ines Mdini, Hanen El Jebari, Asma Ferjani, Gales Emma, Riadh Daghfous, Riadh Gouider. |
| hCoV-19/Egypt/CPHL-NRC-22/2020   | EPI_ISL_794603 | Central Laboratories, Egyptian Ministry of Health and Population               | Kayed,A.E., Roshdy,W.H., El-Shesheny,R., Mostafa,A., Khalifa,M.K., Shehata,M., Shawky,S., Saleh,M., Gomaa,M., El Taweel,A., Mahmoud,S.H., Moatasm,Y., Kutkat,O., Kamel,M.N., Mahrous,N., El-Sayed,M.A., El Guindy,N.M., Naguib,A., Kandeil,A., Kayali,G., Ali,M.A.                                                 |
| hCoV-19/Egypt/CPHL-NRC-21/2020   | EPI_ISL_794604 | Central Laboratories, Egyptian Ministry of Health and Population               | Kayed,A.E., Roshdy,W.H., El-Shesheny,R., Mostafa,A., Khalifa,M.K., Shehata,M., Shawky,S., Saleh,M., Gomaa,M., El Taweel,A., Mahmoud,S.H., Moatasm,Y., Kutkat,O., Kamel,M.N., Mahrous,N., El-Sayed,M.A., El Guindy,N.M., Naguib,A., Kandeil,A., Kayali,G., Ali,M.A.                                                 |
| hCoV-19/Tunisia/4874/2020        | EPI_ISL_811145 | Laboratory of Microbiology, National Reference Lab, Charles Nicolle Hospital   | Moussi, Habiba Ben Romdhane, Souissi Amira, Ines Mdini, Hanen El Jebari, Asma Ferjani, Gales Emma, Riadh Daghfous, Riadh Gouider.                                                                                                                                                                                  |
| hCoV-19/Iraq/USAFSAM-S061/2020   | EPI_ISL_812258 | Landstuhli Regional Medical Center                                             | Anthony Fries, Jennifer Meyer, Amanda Javorina, Sarah Purves, William Gruner, Clarise Starr, Elizabeth Macias, Fritz Castillo, Cole Anderson                                                                                                                                                                       |
| hCoV-19/Iraq/USAFSAM-S062/2020   | EPI_ISL_812259 | Landstuhli Regional Medical Center                                             | Anthony Fries, Jennifer Meyer, Amanda Javorina, Sarah Purves, William Gruner, Clarise Starr, Elizabeth Macias, Fritz Castillo, Cole Anderson                                                                                                                                                                       |
| hCoV-19/Iraq/USAFSAM-S063/2020   | EPI_ISL_812260 | Landstuhli Regional Medical Center                                             | Anthony Fries, Jennifer Meyer, Amanda Javorina, Sarah Purves, William Gruner, Clarise Starr, Elizabeth Macias, Fritz Castillo, Cole Anderson                                                                                                                                                                       |
| hCoV-19/Iraq/USAFSAM-S064/2020   | EPI_ISL_812261 | Landstuhli Regional Medical Center                                             | Anthony Fries, Jennifer Meyer, Amanda Javorina, Sarah Purves, William Gruner, Clarise Starr, Elizabeth Macias, Fritz Castillo, Cole Anderson                                                                                                                                                                       |
| hCoV-19/Iraq/USAFSAM-S065/2020   | EPI_ISL_812262 | Landstuhli Regional Medical Center                                             | Anthony Fries, Jennifer Meyer, Amanda Javorina, Sarah Purves, William Gruner, Clarise Starr, Elizabeth Macias, Fritz Castillo, Cole Anderson                                                                                                                                                                       |
| hCoV-19/Iraq/USAFSAM-S068/2020   | EPI_ISL_812263 | Landstuhli Regional Medical Center                                             | Anthony Fries, Jennifer Meyer, Amanda Javorina, Sarah Purves, William Gruner, Clarise Starr, Elizabeth Macias, Fritz Castillo, Cole Anderson                                                                                                                                                                       |
| hCoV-19/Iraq/USAFSAM-S069/2020   | EPI_ISL_812264 | Landstuhli Regional Medical Center                                             | Anthony Fries, Jennifer Meyer, Amanda Javorina, Sarah Purves, William Gruner, Clarise Starr, Elizabeth Macias, Fritz Castillo, Cole Anderson                                                                                                                                                                       |
| hCoV-19/Iraq/USAFSAM-S070/2020   | EPI_ISL_812265 | Landstuhli Regional Medical Center                                             | Anthony Fries, Jennifer Meyer, Amanda Javorina, Sarah Purves, William Gruner, Clarise Starr, Elizabeth Macias, Fritz Castillo, Cole Anderson                                                                                                                                                                       |
| hCoV-19/Iraq/USAFSAM-S071/2020   | EPI_ISL_812266 | Landstuhli Regional Medical Center                                             | Anthony Fries, Jennifer Meyer, Amanda Javorina, Sarah Purves, William Gruner, Clarise Starr, Elizabeth Macias, Fritz Castillo, Cole Anderson                                                                                                                                                                       |
| hCoV-19/Iraq/USAFSAM-S072/2020   | EPI_ISL_812267 | Landstuhli Regional Medical Center                                             | Anthony Fries, Jennifer Meyer, Amanda Javorina, Sarah Purves, William Gruner, Clarise Starr, Elizabeth Macias, Fritz Castillo, Cole Anderson                                                                                                                                                                       |
| hCoV-19/Iraq/USAFSAM-S073/2020   | EPI_ISL_812268 | Landstuhli Regional Medical Center                                             | Anthony Fries, Jennifer Meyer, Amanda Javorina, Sarah Purves, William Gruner, Clarise Starr, Elizabeth Macias, Fritz Castillo, Cole Anderson                                                                                                                                                                       |
| hCoV-19/Iraq/USAFSAM-S074/2020   | EPI_ISL_812269 | Landstuhli Regional Medical Center                                             | Anthony Fries, Jennifer Meyer, Amanda Javorina, Sarah Purves, William Gruner, Clarise Starr, Elizabeth Macias, Fritz Castillo, Cole Anderson                                                                                                                                                                       |
| hCoV-19/Iraq/USAFSAM-S075/2020   | EPI_ISL_812270 | Landstuhli Regional Medical Center                                             | Anthony Fries, Jennifer Meyer, Amanda Javorina, Sarah Purves, William Gruner, Clarise Starr, Elizabeth Macias, Fritz Castillo, Cole Anderson                                                                                                                                                                       |
| hCoV-19/Iraq/USAFSAM-S076/2020   | EPI_ISL_812271 | Landstuhli Regional Medical Center                                             | Anthony Fries, Jennifer Meyer, Amanda Javorina, Sarah Purves, William Gruner, Clarise Starr, Elizabeth Macias, Fritz Castillo, Cole Anderson                                                                                                                                                                       |
| hCoV-19/Iraq/USAFSAM-S077/2020   | EPI_ISL_812272 | Landstuhli Regional Medical Center                                             | Anthony Fries, Jennifer Meyer, Amanda Javorina, Sarah Purves, William Gruner, Clarise Starr, Elizabeth Macias, Fritz Castillo, Cole Anderson                                                                                                                                                                       |
| hCoV-19/Iraq/USAFSAM-S078/2020   | EPI_ISL_812273 | Landstuhli Regional Medical Center                                             | Anthony Fries, Jennifer Meyer, Amanda Javorina, Sarah Purves, William Gruner, Clarise Starr, Elizabeth Macias, Fritz Castillo, Cole Anderson                                                                                                                                                                       |
| hCoV-19/Iraq/USAFSAM-S079/2020   | EPI_ISL_812274 | Landstuhli Regional Medical Center                                             | Anthony Fries, Jennifer Meyer, Amanda Javorina, Sarah Purves, William Gruner, Clarise Starr, Elizabeth Macias, Fritz Castillo, Cole Anderson                                                                                                                                                                       |
| hCoV-19/Iraq/USAFSAM-S080/2020   | EPI_ISL_812275 | Landstuhli Regional Medical Center                                             | Anthony Fries, Jennifer Meyer, Amanda Javorina, Sarah Purves, William Gruner, Clarise Starr, Elizabeth Macias, Fritz Castillo, Cole Anderson                                                                                                                                                                       |
| hCoV-19/Iraq/USAFSAM-S081/2020   | EPI_ISL_812276 | Landstuhli Regional Medical Center                                             | Anthony Fries, Jennifer Meyer, Amanda Javorina, Sarah Purves, William Gruner, Clarise Starr, Elizabeth Macias, Fritz Castillo, Cole Anderson                                                                                                                                                                       |

|                                  |                 |                                                                |                                                                                                                                                                                                                                                                                                      |
|----------------------------------|-----------------|----------------------------------------------------------------|------------------------------------------------------------------------------------------------------------------------------------------------------------------------------------------------------------------------------------------------------------------------------------------------------|
| hCoV-19/Iraq/USAFSAM-S082/2020   | EPI_ISL_812277  | Landstuhli Regional Medical Center                             | Anthony Fries, Jennifer Meyer, Amanda Javorina, Sarah Purves, William Gruner, Clarise Starr, Elizabeth Macias, Fritz Castillo, Cole Anderson                                                                                                                                                         |
| hCoV-19/Iraq/USAFSAM-S083/2020   | EPI_ISL_812278  | Landstuhli Regional Medical Center                             | Anthony Fries, Jennifer Meyer, Amanda Javorina, Sarah Purves, William Gruner, Clarise Starr, Elizabeth Macias, Fritz Castillo, Cole Anderson                                                                                                                                                         |
| hCoV-19/Iraq/USAFSAM-S084/2020   | EPI_ISL_812279  | Landstuhli Regional Medical Center                             | Anthony Fries, Jennifer Meyer, Amanda Javorina, Sarah Purves, William Gruner, Clarise Starr, Elizabeth Macias, Fritz Castillo, Cole Anderson                                                                                                                                                         |
| hCoV-19/Iraq/USAFSAM-S085/2020   | EPI_ISL_812280  | Landstuhli Regional Medical Center                             | Anthony Fries, Jennifer Meyer, Amanda Javorina, Sarah Purves, William Gruner, Clarise Starr, Elizabeth Macias, Fritz Castillo, Cole Anderson                                                                                                                                                         |
| hCoV-19/Iraq/USAFSAM-S086/2020   | EPI_ISL_812281  | Landstuhli Regional Medical Center                             | Anthony Fries, Jennifer Meyer, Amanda Javorina, Sarah Purves, William Gruner, Clarise Starr, Elizabeth Macias, Fritz Castillo, Cole Anderson                                                                                                                                                         |
| hCoV-19/Iraq/USAFSAM-S088/2020   | EPI_ISL_812282  | Landstuhli Regional Medical Center                             | Anthony Fries, Jennifer Meyer, Amanda Javorina, Sarah Purves, William Gruner, Clarise Starr, Elizabeth Macias, Fritz Castillo, Cole Anderson                                                                                                                                                         |
| hCoV-19/Iraq/USAFSAM-S091/2020   | EPI_ISL_812284  | Landstuhli Regional Medical Center                             | Anthony Fries, Jennifer Meyer, Amanda Javorina, Sarah Purves, William Gruner, Clarise Starr, Elizabeth Macias, Fritz Castillo, Cole Anderson                                                                                                                                                         |
| hCoV-19/Iraq/USAFSAM-S092/2020   | EPI_ISL_812285  | Landstuhli Regional Medical Center                             | Anthony Fries, Jennifer Meyer, Amanda Javorina, Sarah Purves, William Gruner, Clarise Starr, Elizabeth Macias, Fritz Castillo, Cole Anderson                                                                                                                                                         |
| hCoV-19/Egypt/CHE57357-A-13/2020 | EPI_ISL_812793  | Genomics Program, Children Cancer Hospital                     | Hatem A., Hadad A., Abouelnaga S., Amer K., Salah H., Farawyla H., Halaflawy A., Mansour T., Shalaby L., Hassan W., Soliman M., Goma S., Hassan R., Soliman S., Monir G., Hammad M., Hussein S., Abdol J., Jalal D., El-Zayat M., El-Shaqnery H., Diab A., Bakry U., Samir O., Magdelin S., Sayed A. |
| hCoV-19/Lebanon/LAU-R107/2020    | EPI_ISL_8311702 | LAUMC-Rizk Hospital                                            | Nancy Fayad, Walid Abi Habib, Rabeh El-Shesheny, Ahmed Kandeil, Youmna Mourad, Jacques Mokhbat, Ghazi Kayali, Jimi Goldstein and Jad Abdallah                                                                                                                                                        |
| hCoV-19/Lebanon/LAU-R126/2020    | EPI_ISL_8311703 | LAUMC-Rizk Hospital                                            | Nancy Fayad, Walid Abi Habib, Rabeh El-Shesheny, Ahmed Kandeil, Youmna Mourad, Jacques Mokhbat, Ghazi Kayali, Jimi Goldstein and Jad Abdallah                                                                                                                                                        |
| hCoV-19/Lebanon/LAU-R128/2020    | EPI_ISL_8311704 | LAUMC-Rizk Hospital                                            | Nancy Fayad, Walid Abi Habib, Rabeh El-Shesheny, Ahmed Kandeil, Youmna Mourad, Jacques Mokhbat, Ghazi Kayali, Jimi Goldstein and Jad Abdallah                                                                                                                                                        |
| hCoV-19/Lebanon/LAU-R130/2020    | EPI_ISL_8311705 | LAUMC-Rizk Hospital                                            | Nancy Fayad, Walid Abi Habib, Rabeh El-Shesheny, Ahmed Kandeil, Youmna Mourad, Jacques Mokhbat, Ghazi Kayali, Jimi Goldstein and Jad Abdallah                                                                                                                                                        |
| hCoV-19/Lebanon/LAU-R135/2020    | EPI_ISL_8311706 | LAUMC-Rizk Hospital                                            | Nancy Fayad, Walid Abi Habib, Rabeh El-Shesheny, Ahmed Kandeil, Youmna Mourad, Jacques Mokhbat, Ghazi Kayali, Jimi Goldstein and Jad Abdallah                                                                                                                                                        |
| hCoV-19/Lebanon/LAU-R137/2020    | EPI_ISL_8311707 | LAUMC-Rizk Hospital                                            | Nancy Fayad, Walid Abi Habib, Rabeh El-Shesheny, Ahmed Kandeil, Youmna Mourad, Jacques Mokhbat, Ghazi Kayali, Jimi Goldstein and Jad Abdallah                                                                                                                                                        |
| hCoV-19/Lebanon/LAU-R150/2020    | EPI_ISL_8311708 | LAUMC-Rizk Hospital                                            | Nancy Fayad, Walid Abi Habib, Rabeh El-Shesheny, Ahmed Kandeil, Youmna Mourad, Jacques Mokhbat, Ghazi Kayali, Jimi Goldstein and Jad Abdallah                                                                                                                                                        |
| hCoV-19/Lebanon/LAU-R158/2020    | EPI_ISL_8311709 | LAUMC-Rizk Hospital                                            | Nancy Fayad, Walid Abi Habib, Rabeh El-Shesheny, Ahmed Kandeil, Youmna Mourad, Jacques Mokhbat, Ghazi Kayali, Jimi Goldstein and Jad Abdallah                                                                                                                                                        |
| hCoV-19/Lebanon/LAU-R178/2020    | EPI_ISL_8311711 | LAUMC-Rizk Hospital                                            | Nancy Fayad, Walid Abi Habib, Rabeh El-Shesheny, Ahmed Kandeil, Youmna Mourad, Jacques Mokhbat, Ghazi Kayali, Jimi Goldstein and Jad Abdallah                                                                                                                                                        |
| hCoV-19/Lebanon/LAU-R289/2020    | EPI_ISL_8311729 | LAUMC-Rizk Hospital                                            | Nancy Fayad, Walid Abi Habib, Rabeh El-Shesheny, Ahmed Kandeil, Youmna Mourad, Jacques Mokhbat, Ghazi Kayali, Jimi Goldstein and Jad Abdallah                                                                                                                                                        |
| hCoV-19/Lebanon/LAU-R293/2020    | EPI_ISL_8311730 | LAUMC-Rizk Hospital                                            | Nancy Fayad, Walid Abi Habib, Rabeh El-Shesheny, Ahmed Kandeil, Youmna Mourad, Jacques Mokhbat, Ghazi Kayali, Jimi Goldstein and Jad Abdallah                                                                                                                                                        |
| hCoV-19/Lebanon/LAU-R294/2020    | EPI_ISL_8311731 | LAUMC-Rizk Hospital                                            | Nancy Fayad, Walid Abi Habib, Rabeh El-Shesheny, Ahmed Kandeil, Youmna Mourad, Jacques Mokhbat, Ghazi Kayali, Jimi Goldstein and Jad Abdallah                                                                                                                                                        |
| hCoV-19/Lebanon/LAU-R328/2020    | EPI_ISL_8311733 | LAUMC-Rizk Hospital                                            | Nancy Fayad, Walid Abi Habib, Rabeh El-Shesheny, Ahmed Kandeil, Youmna Mourad, Jacques Mokhbat, Ghazi Kayali, Jimi Goldstein and Jad Abdallah                                                                                                                                                        |
| hCoV-19/Lebanon/LAU-R330/2020    | EPI_ISL_8311734 | LAUMC-Rizk Hospital                                            | Nancy Fayad, Walid Abi Habib, Rabeh El-Shesheny, Ahmed Kandeil, Youmna Mourad, Jacques Mokhbat, Ghazi Kayali, Jimi Goldstein and Jad Abdallah                                                                                                                                                        |
| hCoV-19/Lebanon/LAU-R350/2020    | EPI_ISL_8311741 | LAUMC-Rizk Hospital                                            | Nancy Fayad, Walid Abi Habib, Rabeh El-Shesheny, Ahmed Kandeil, Youmna Mourad, Jacques Mokhbat, Ghazi Kayali, Jimi Goldstein and Jad Abdallah                                                                                                                                                        |
| hCoV-19/Lebanon/LAU-R84/2020     | EPI_ISL_8311755 | LAUMC-Rizk Hospital                                            | Nancy Fayad, Walid Abi Habib, Rabeh El-Shesheny, Ahmed Kandeil, Youmna Mourad, Jacques Mokhbat, Ghazi Kayali, Jimi Goldstein and Jad Abdallah                                                                                                                                                        |
| hCoV-19/Lebanon/LAU-R89/2020     | EPI_ISL_8311756 | LAUMC-Rizk Hospital                                            | Nancy Fayad, Walid Abi Habib, Rabeh El-Shesheny, Ahmed Kandeil, Youmna Mourad, Jacques Mokhbat, Ghazi Kayali, Jimi Goldstein and Jad Abdallah                                                                                                                                                        |
| hCoV-19/Lebanon/LAU-R97/2020     | EPI_ISL_8311758 | LAUMC-Rizk Hospital                                            | Nancy Fayad, Walid Abi Habib, Rabeh El-Shesheny, Ahmed Kandeil, Youmna Mourad, Jacques Mokhbat, Ghazi Kayali, Jimi Goldstein and Jad Abdallah                                                                                                                                                        |
| hCoV-19/Iran/Tehran-09/2020      | EPI_ISL_862077  | National Influenza Center, Virology Department                 | J Yavarian, K Sadeghi, NZ Shafiei Jandaghi, V Salimi, A Nejadi, N Ghavvami, F Ajaminejad and T Mokhtari Azad                                                                                                                                                                                         |
| hCoV-19/Iran/Tehran-08/2020      | EPI_ISL_862078  | National Influenza Center, Virology Department                 | A Nejadi, J Yavarian, K Sadeghi, NZ Shafiei Jandaghi, V Salimi, N Ghavvami, F Ajaminejad and T Mokhtari Azad                                                                                                                                                                                         |
| hCoV-19/Kuwait/SKS00113-JAH/2020 | EPI_ISL_903388  | MOH - Jaber Al-Ahmad Hospital (Innovation Research Laboratory) | Salman Al-Sabah , Mohammad Alghounaim                                                                                                                                                                                                                                                                |
| hCoV-19/Kuwait/SKS00103-JAH/2020 | EPI_ISL_903389  | MOH - Jaber Al-Ahmad Hospital (Innovation Research Laboratory) | Salman Al-Sabah , Mohammad Alghounaim                                                                                                                                                                                                                                                                |
| hCoV-19/Iraq/BAS-2/2020          | EPI_ISL_907075  | Department of Biology, University of Basrah                    | Abu-Ali, H.M. and Al-Badran, J.F.                                                                                                                                                                                                                                                                    |
| hCoV-19/Iraq/BAS-1/2020          | EPI_ISL_956332  | Department of Biology, University of Basrah                    | Abu-Ali, H.F. and Al-Badran, A.I.                                                                                                                                                                                                                                                                    |
